# Supplementary material for: Relationship of micro-RNA, mRNA and eIF Expression in Tamoxifen-Adapted MCF-7 Breast Cancer Cells: Impact of miR-1972 on Gene Expression, Proliferation and Migration
Source: MDPI journal article supplement (doi:10.3390/biom12070916), 2022-06-29
Supplement: s1 [file s1]

| pam50           |         | normalized counts |                    |                    |       |                  |                        |       |                |                      |      |
|-----------------|---------|-------------------|--------------------|--------------------|-------|------------------|------------------------|-------|----------------|----------------------|------|
| gene            |         | MCF-7             | TAM                | logFc<br>TAM/MCF-7 | p     | MCF-7<br>miR1972 | logFc MCF-7<br>miR1972 | p     | TAM<br>miR1972 | logFc TAM<br>miR1972 | p    |
| Luminal<br>A    | MAPT    | 546.19            | 508.80             | -0.51              | 0.326 | 367.68           | -0.57                  | 0.003 | 384.46         | -0.40                | 0.11 |
|                 | NAT1    | 333.26            | 283.11             | 0.04               | 0.215 | 618.81           | 0.89                   | 0.129 | 343.60         | 0.28                 | 0.16 |
|                 | SLC39A6 | 70892.83          | 6856.74<br>10818.9 | -3.44              | 0.001 | 66882.81         | -0.08                  | 0.489 | 6537.37        | -0.07                | 0.21 |
|                 | BIRC5   | 8339.69           | 7                  | 0.06               | 0.036 | 8337.49          | 0.00                   | 0.985 | 8702.10        | -0.31                | 0.06 |
|                 | CDCA1   | 250.71            | 306.93             | 0.71               | 0.129 | 362.20           | 0.53                   | 0.114 | 408.85         | 0.41                 | 0.09 |
|                 | CENPF   | 1141.37           | 1587.13            | 0.67               | 0.000 | 1381.64          | 0.28                   | 0.169 | 1818.29        | 0.20                 | 0.05 |
|                 | EXO1    | 1221.95           | 1959.46            | 0.59               | 0.104 | 1414.14          | 0.21                   | 0.080 | 1833.34        | -0.10                | 0.49 |
|                 | MYBL2   | 3018.42           | 2930.51            | -0.09              | 0.406 | 3397.60          | 0.17                   | 0.134 | 2829.99        | -0.05                | 0.48 |
|                 | PTTG1   | 8131.24           | 4014.87            | -0.74              | 0.004 | 10681.48         | 0.39                   | 0.122 | 4875.72        | 0.28                 | 0.04 |
|                 | UBE2C   | 8725.24           | 7139.99            | -0.13              | 0.011 | 11872.11         | 0.44                   | 0.021 | 7947.82        | 0.15                 | 0.07 |
| Luminal<br>B    | CXXC5   | 9914.69           | 4342.52            | -1.11              | 0.006 | 8890.62          | -0.16                  | 0.305 | 4587.38        | 0.08                 | 0.50 |
|                 | KIF2C   | 1343.94           | 1580.62<br>12163.5 | 0.19               | 0.078 | 1614.95          | 0.27                   | 0.119 | 1533.14        | -0.04                | 0.58 |
|                 | MDM2    | 10010.39          | 6                  | -0.66              | 0.030 | 5370.77          | -0.90                  | 0.005 | 6334.31        | -0.94                | 0.02 |
|                 | ORC6L   | 1601.75           | 2061.44            | 0.32               | 0.042 | 1885.28          | 0.24                   | 0.114 | 2001.59        | -0.04                | 0.31 |
|                 | PGR     | 782.54            | 1.14               | -9.44              | 0.009 | 828.12           | 0.08                   | 0.718 | 1.13           | -0.01                | 0.92 |
|                 | BCL2    | 30.10             | 1.14               | -2.41              | 0.046 | 14.51            | -1.05                  | 0.151 | 5.66           | 2.32                 | 0.51 |
|                 | CDH3    | 1245.00           | 1842.93            | 0.41               | 0.010 | 1405.59          | 0.18                   | 0.155 | 1658.92        | -0.15                | 0.14 |
|                 | EGFR    | 1.35              | 165.91             | 7.44               | 0.046 | 24.47            | 4.18                   | 0.035 | 234.22         | 0.50                 | 0.13 |
|                 | MKI67   | 3611.20           | 5684.00            | 0.58               | 0.031 | 3754.27          | 0.06                   | 0.571 | 5390.96        | -0.08                | 0.52 |
|                 | PHGDH   | 2038.05           | 2893.81            | 0.67               | 0.016 | 2513.79          | 0.30                   | 0.051 | 3240.15        | 0.16                 | 0.08 |
| Normal-<br>like | KRT14   | 73.96             | 95.27              | 0.02               | 0.396 | 76.89            | 0.06                   | 0.436 | 75.03          | -0.34                | 0.41 |
|                 | KRT17   | 1.35              | 1.14               | -0.26              | 0.171 | 1.16             | -0.22                  | 0.332 | 1.13           | -0.01                | 0.92 |

|               |        |          |                    |       |       |          |       |       |          |       |      |
|---------------|--------|----------|--------------------|-------|-------|----------|-------|-------|----------|-------|------|
| HER2-enriched | KRT5   | 1.35     | 1.14               | -0.26 | 0.171 | 1.16     | -0.22 | 0.332 | 1.13     | -0.01 | 0.92 |
|               | MLPH   | 2963.29  | 1141.84<br>20053.6 | -1.25 | 0.000 | 2479.03  | -0.26 | 0.007 | 1249.29  | 0.13  | 0.05 |
|               | CCNB1  | 23152.43 | 5                  | -0.35 | 0.088 | 23950.34 | 0.05  | 0.411 | 18212.90 | -0.14 | 0.17 |
|               | CDC6   | 1773.17  | 2964.27            | 0.37  | 0.001 | 1918.39  | 0.11  | 0.385 | 2298.86  | -0.37 | 0.00 |
|               | MMP11  | 40.73    | 58.92<br>26042.6   | 0.89  | 0.188 | 68.80    | 0.76  | 0.127 | 75.35    | 0.35  | 0.22 |
|               | RRM2   | 16892.73 | 9                  | 0.97  | 0.011 | 25230.78 | 0.58  | 0.054 | 33203.74 | 0.35  | 0.00 |
|               | TYMS   | 4099.73  | 5803.24            | 1.44  | 0.080 | 8506.32  | 1.05  | 0.002 | 11144.89 | 0.94  | 0.03 |
|               | UBE2T  | 973.01   | 1224.22            | 0.68  | 0.055 | 1647.77  | 0.76  | 0.040 | 1562.72  | 0.35  | 0.08 |
|               | BLVRA  | 3396.20  | 530.83             | -2.25 | 0.005 | 4270.76  | 0.33  | 0.162 | 715.17   | 0.43  | 0.01 |
|               | ERBB2  | 785.79   | 1481.27            | 0.38  | 0.000 | 666.88   | -0.24 | 0.144 | 1024.74  | -0.53 | 0.06 |
| Basal-like    | FGFR4  | 538.56   | 176.13             | -0.81 | 0.003 | 669.72   | 0.31  | 0.017 | 307.47   | 0.80  | 0.13 |
|               | GRB7   | 426.96   | 684.45             | 0.43  | 0.065 | 426.31   | 0.00  | 0.993 | 574.81   | -0.25 | 0.25 |
|               | BAG1   | 5533.10  | 6025.13            | 0.62  | 0.030 | 5765.71  | 0.06  | 0.328 | 8519.43  | 0.50  | 0.00 |
|               | CCNE1  | 1498.51  | 4865.70            | 1.68  | 0.008 | 1313.12  | -0.19 | 0.270 | 4812.73  | -0.02 | 0.83 |
|               | CDC20  | 3385.66  | 3761.93            | -0.03 | 0.032 | 3743.88  | 0.15  | 0.147 | 3312.49  | -0.18 | 0.02 |
|               | ACTR3B | 1663.17  | 1543.53<br>14714.4 | 0.00  | 0.084 | 1653.71  | -0.01 | 0.763 | 1661.61  | 0.11  | 0.11 |
|               | MYC    | 6889.91  | 9                  | 0.79  | 0.010 | 4813.92  | -0.52 | 0.010 | 11882.28 | -0.31 | 0.03 |
|               | SFRP1  | 1.35     | 1.14               | -0.26 | 0.171 | 1.16     | -0.22 | 0.332 | 1.13     | -0.01 | 0.92 |
|               | ANLN   | 4598.01  | 5557.60            | 0.19  | 0.035 | 5877.85  | 0.35  | 0.025 | 5255.69  | -0.08 | 0.07 |
|               | CEP55  | 2538.54  | 2681.69            | 0.36  | 0.327 | 3578.57  | 0.50  | 0.023 | 3263.35  | 0.28  | 0.02 |
|               | FOXC1  | 868.90   | 719.45             | -0.18 | 0.024 | 1376.00  | 0.66  | 0.023 | 768.94   | 0.10  | 0.28 |
|               | KNTC2  | 2882.35  | 3231.61            | 0.39  | 0.145 | 4041.11  | 0.49  | 0.048 | 3765.64  | 0.22  | 0.10 |
|               | MELK   | 2221.79  | 2016.71            | -0.19 | 0.106 | 2432.58  | 0.13  | 0.050 | 1942.40  | -0.05 | 0.48 |
|               | MIA    | 1.35     | 1.14               | -0.26 | 0.171 | 1.16     | -0.22 | 0.332 | 1.13     | -0.01 | 0.92 |
|               | ESR1   | 9725.30  | 3173.03<br>11383.9 | -1.71 | 0.009 | 7523.40  | -0.37 | 0.136 | 2966.47  | -0.10 | 0.44 |
|               | FOXA1  | 13826.26 | 4                  | -0.85 | 0.021 | 10748.57 | -0.36 | 0.015 | 7696.35  | -0.56 | 0.00 |

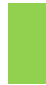

|         |         |         |      |       |         |      |       |         |       |      |
|---------|---------|---------|------|-------|---------|------|-------|---------|-------|------|
| GPR160  | 5971.36 | 7932.95 | 0.29 | 0.152 | 6025.83 | 0.01 | 0.876 | 7318.88 | -0.12 | 0.48 |
| TMEM45B | 106.41  | 2366.38 | 4.03 | 0.015 | 225.66  | 1.08 | 0.180 | 1738.32 | -0.44 | 0.04 |

**Tam-  
gene set**

| Name         | normalized counts |        | logFc     |       | MCF-7   | logFC MCF-7 / |       | TAM     | logFc TAM |       |
|--------------|-------------------|--------|-----------|-------|---------|---------------|-------|---------|-----------|-------|
|              | MCF-7             | TAM    | TAM/MCF-7 | p     | miR1972 | mir1972       | p     | miR1972 | miR1972   | p     |
| UBD          | 0.0273            | 0.0525 | 0.94      | 0.191 | 0.0052  | -2.38         | 0.012 | 0.0057  | -3.20     | 0.109 |
| KLK11        | 0.0227            | 0.0007 | -5.06     | 0.011 | 0.0418  | 0.88          | 0.213 | 0.0001  | -3.48     | 0.157 |
| LINC01213    | 0.0126            | 0.0838 | 2.73      | 0.006 | 0.0151  | 0.26          | 0.467 | 0.0671  | -0.32     | 0.077 |
| BMP5         | 0.0334            | 0.0003 | -6.80     | 0.020 | 0.0659  | 0.98          | 0.026 | 0.0002  | -0.40     | 0.685 |
| VAV3         | 0.1432            | 0.0099 | -3.86     | 0.001 | 0.1290  | -0.15         | 0.068 | 0.0070  | -0.51     | 0.342 |
| PGK1         | 1.3372            | 1.6511 | 0.30      | 0.003 | 0.7797  | -0.78         | 0.047 | 0.8317  | -0.99     | 0.000 |
| LINC00992    | 0.0004            | 0.0011 | 1.50      | 0.308 | 0.0005  | 0.35          | 0.843 | 0.0003  | -1.73     | 0.129 |
| SIM1         | 0.0018            | 0.0010 | -0.86     | 0.307 | 0.0021  | 0.18          | 0.764 | 0.0005  | -1.01     | 0.335 |
| LOC101929547 | 0.0123            | 0.0009 | -3.75     | 0.099 | 0.0262  | 1.09          | 0.032 | 0.0013  | 0.54      | 0.302 |
| GPR68        | 0.1063            | 0.0019 | -5.78     | 0.015 | 0.0941  | -0.18         | 0.353 | 0.0021  | 0.14      | 0.511 |
| KRT4         | 0.0023            | 0.0056 | 1.28      | 0.216 | 0.0164  | 2.84          | 0.190 | 0.0210  | 1.92      | 0.019 |
| ZNF462       | 0.0063            | 0.0077 | 0.31      | 0.195 | 0.0030  | -1.08         | 0.080 | 0.0047  | -0.72     | 0.050 |
| ARHGAP26     | 0.0180            | 0.1451 | 3.01      | 0.020 | 0.0111  | -0.70         | 0.031 | 0.0612  | -1.25     | 0.008 |
| RPL13        | 1.0000            | 1.0000 | 0.00      |       | 1.0000  | 0.00          |       | 1.0000  | 0.00      |       |
| C1orf226     | 0.0427            | 0.0115 | -1.89     | 0.022 | 0.0332  | -0.36         | 0.160 | 0.0073  | -0.66     | 0.109 |
| DHRS3        | 0.3540            | 1.0164 | 1.52      | 0.003 | 0.4829  | 0.45          | 0.408 | 0.5867  | -0.79     | 0.015 |
| BPIFB1       | 0.0743            | 0.0427 | -0.80     | 0.080 | 0.0446  | -0.74         | 0.039 | 0.0166  | -1.36     | 0.054 |
| CLTC         | 2.2876            | 3.0055 | 0.39      | 0.024 | 1.6421  | -0.48         | 0.125 | 1.9518  | -0.62     | 0.050 |
| LINC00632    | 0.0013            | 0.0016 | 0.34      | 0.436 | 0.0009  | -0.45         | 0.051 | 0.0007  | -1.14     | 0.158 |
| CA2          | 0.6589            | 0.0047 | -7.13     | 0.005 | 0.6125  | -0.11         | 0.212 | 0.0026  | -0.84     | 0.252 |
| GUSB         | 0.2040            | 0.2419 | 0.25      | 0.007 | 0.2023  | -0.01         | 0.808 | 0.1832  | -0.40     | 0.015 |
| FAXDC2       | 0.0311            | 0.0019 | -4.00     | 0.002 | 0.0163  | -0.94         | 0.101 | 0.0009  | -1.13     | 0.403 |

|           |         |         |       |       |         |       |       |         |       |       |
|-----------|---------|---------|-------|-------|---------|-------|-------|---------|-------|-------|
| BDKRB2    | 0.0342  | 0.0367  | 0.10  | 0.524 | 0.0160  | -1.10 | 0.011 | 0.0086  | -2.10 | 0.059 |
| CEACAM6   | 0.0931  | 0.0930  | 0.00  | 0.999 | 0.1188  | 0.35  | 0.220 | 0.1070  | 0.20  | 0.400 |
| GREB1     | 0.1148  | 0.0032  | -5.16 | 0.012 | 0.0480  | -1.26 | 0.011 | 0.0011  | -1.52 | 0.092 |
| EPAS1     | 0.2039  | 1.2428  | 2.61  | 0.005 | 0.0833  | -1.29 | 0.041 | 0.3450  | -1.85 | 0.002 |
| GPFR1     | 0.0699  | 0.0036  | -4.29 | 0.035 | 0.0331  | -1.08 | 0.022 | 0.0013  | -1.42 | 0.108 |
| DEFB1     | 0.0015  | 0.0022  | 0.57  | 0.281 | 0.0011  | -0.38 | 0.411 | 0.0012  | -0.92 | 0.185 |
| FOLH1     | 0.0030  | 0.0032  | 0.07  | 0.767 | 0.0027  | -0.17 | 0.515 | 0.0013  | -1.26 | 0.111 |
| AR        | 0.0438  | 0.0529  | 0.27  | 0.082 | 0.0405  | -0.11 | 0.364 | 0.0382  | -0.47 | 0.050 |
| RAMP3     | 0.1101  | 0.0026  | -5.42 | 0.038 | 0.1002  | -0.14 | 0.709 | 0.0017  | -0.57 | 0.262 |
| RGS22     | 0.0026  | 0.0021  | -0.33 | 0.514 | 0.0016  | -0.72 | 0.315 | 0.0007  | -1.52 | 0.013 |
| GPX2      | 0.0348  | 0.0310  | -0.17 | 0.519 | 0.0305  | -0.19 | 0.685 | 0.0162  | -0.93 | 0.071 |
| ADAMTS9   | 0.0121  | 0.0043  | -1.50 | 0.010 | 0.0046  | -1.41 | 0.003 | 0.0019  | -1.18 | 0.067 |
| SPINK4    | 0.0144  | 0.0082  | -0.81 | 0.046 | 0.0143  | 0.00  | 0.985 | 0.0040  | -1.03 | 0.083 |
| ACTB      | 23.4840 | 35.0097 | 0.58  | 0.011 | 18.7127 | -0.33 | 0.251 | 20.5542 | -0.77 | 0.004 |
| PTGER4    | 0.0233  | 0.0112  | -1.06 | 0.076 | 0.0172  | -0.43 | 0.122 | 0.0072  | -0.64 | 0.102 |
| SOX3      | 0.0883  | 0.0015  | -5.92 | 0.028 | 0.0828  | -0.09 | 0.518 | 0.0015  | 0.04  | 0.833 |
| TFF3      | 0.1555  | 0.0031  | -5.66 | 0.020 | 0.0737  | -1.08 | 0.012 | 0.0020  | -0.63 | 0.224 |
| BAMBI     | 1.7970  | 2.6266  | 0.55  | 0.042 | 1.4300  | -0.33 | 0.062 | 1.4212  | -0.89 | 0.002 |
| TARP      | 0.0412  | 0.0026  | -3.97 | 0.001 | 0.0820  | 0.99  | 0.010 | 0.0015  | -0.81 | 0.446 |
| SEMA5A    | 0.0174  | 0.3339  | 4.26  | 0.000 | 0.0120  | -0.54 | 0.185 | 0.1800  | -0.89 | 0.057 |
| ABCA12    | 0.0237  | 0.0039  | -2.58 | 0.017 | 0.0201  | -0.24 | 0.246 | 0.0016  | -1.35 | 0.161 |
| AMIGO2    | 0.1437  | 0.7469  | 2.38  | 0.042 | 0.1654  | 0.20  | 0.021 | 0.4108  | -0.86 | 0.028 |
| XR_133213 | 0.0036  | 0.0034  | -0.09 | 0.684 | 0.0033  | -0.10 | 0.120 | 0.0027  | -0.33 | 0.334 |
| PIP       | 0.0025  | 0.0043  | 0.82  | 0.129 | 0.0028  | 0.21  | 0.171 | 0.0021  | -1.04 | 0.065 |
| LINC00683 | 0.0111  | 0.0038  | -1.54 | 0.022 | 0.0144  | 0.38  | 0.232 | 0.0021  | -0.86 | 0.238 |
| HPRT1     | 0.4892  | 0.7879  | 0.69  | 0.076 | 0.5229  | 0.10  | 0.505 | 0.7089  | -0.15 | 0.241 |
