# Supplementary material for: Relationship of micro-RNA, mRNA and eIF Expression in Tamoxifen-Adapted MCF-7 Breast Cancer Cells: Impact of miR-1972 on Gene Expression, Proliferation and Migration
Source: MDPI journal article supplement (doi:10.3390/biom12070916), 2022-06-29
Supplement: s1 [file s1]

**Table S2A.** Relative expression of micro RNAs as determined by qRT PCR. Values are expressed as log<sub>2</sub>Fc relative to RPL-13 and MCF-7.

|             | MCF-7 | Tam   | MDA-MB-468 | HS578T | SkBr3 | MDA-MB-231 | UACC3199 | T47D  |
|-------------|-------|-------|------------|--------|-------|------------|----------|-------|
| miR-1972    | -0.02 | -2.63 | -5.82      | -5.17  | -7.22 | -6.69      | -4.73    | -5.16 |
| miR-455     | -0.11 | 2.88  | b.d.*      | 3.55   | 4.00  | 2.92       | 4.59     | 1.21  |
| miR-213     | -0.06 | 2.25  | 1.89       | 2.64   | 1.42  | 3.29       | 3.24     | 1.86  |
| miR-375     | -0.14 | -4.90 | -1.52      | -12.20 | -1.45 | -11.64     | -0.76    | 0.85  |
| miR-181b-5p | -0.08 | 4.89  | 6.97       | 5.99   | 5.10  | 6.33       | 5.16     | 7.57  |
| miR-181d-5p | -0.02 | 5.30  | 5.78       | 5.96   | 6.29  | 7.47       | 4.83     | 7.54  |

\* below detection limit

**Table S2B.** Statistical analysis of miRNA expression in breast cancer cell lines. p-values of ANOVA post-hoc analysis are shown. Either LSD or Tamhane T2 post hoc analysis was applied, depending on results of the Levene test for equal variances.

| miR1972 (LSD) | MCF-7   | TamR    | MDA-MB-468 | HS578T  | Sk-Br3  | MDA-MB-231 | UACC3199 | T47D         |
|---------------|---------|---------|------------|---------|---------|------------|----------|--------------|
| MCF-7         |         | < 0.001 |            | < 0.001 | < 0.001 | < 0.001    | < 0.001  | 0.001        |
| TamR          | < 0.001 |         |            | 0.077   | 0.006   | 0.906      | < 0.001  | < 0.001      |
| MDA-MB-468    | < 0.001 | < 0.001 |            |         |         |            |          |              |
| HS578T        | < 0.001 | < 0.001 | 0.173      |         | 0.258   | 0.118      | 0.015    | < 0.001      |
| SkBr3         | < 0.001 | < 0.001 | 0.014      | < 0.001 |         | 0.012      | 0.148    | < 0.001      |
| MDA-MB-231    | < 0.001 | < 0.001 | 0.108      | 0.008   | 0.360   |            | < 0.001  | < 0.001      |
| UACC3199      | < 0.001 | < 0.001 | 0.029      | 0.356   | < 0.001 | 0.001      |          | < 0.001      |
| T47D          | < 0.001 | < 0.001 | 0.169      | 0.989   | 0.001   | 0.008      | 0.363    | miR455 (LSD) |

  

| miR-213 (T2) | MCF-7   | TamR    | MDA-MB468 | HS578T | SkBr3 | MDA-MB231 | UACC3199 | T47D         |
|--------------|---------|---------|-----------|--------|-------|-----------|----------|--------------|
| MCF-7        |         | < 0.001 | 0.869     | 0.722  | 0.292 | 0.049     | 0.932    | 0.473        |
| TamR         | 0.003   |         | 0.176     | 0.907  | 0.007 | 0.196     | < 0.001  | < 0.001      |
| MDA-MB-468   | 1.000   | 1.000   |           | 0.625  | 1.000 | 0.026     | 0.999    | 0.475        |
| HS578T       | 0.001   | 0.999   | 1.000     |        | 0.779 | 1.000     | 0.794    | 0.734        |
| SkBr3        | 0.014   | 0.555   | 1.000     | 0.144  |       | 0.075     | 0.944    | 0.069        |
| MDA-MB-231   | 0.115   | 0.935   | 1.000     | 0.999  | 0.543 |           | 0.093    | 0.062        |
| UACC3199     | < 0.001 | 0.394   | 1.000     | 0.864  | 0.041 | 1.000     |          | 0.099        |
| T47D         | 0.534   | 1.000   | 1.000     | 0.997  | 1.000 | 0.845     | 0.838    | miR-375 (T2) |

| miR-181b-5p (LSD) | MCF-7    | TamR    | MDA-MB-468 | HS578T  | Sk-Br3  | MDA-MB-231 | UACC3199 | T47D              |
|-------------------|----------|---------|------------|---------|---------|------------|----------|-------------------|
| MCF-7             |          | < 0.001 | < 0.001    | < 0.001 | < 0.001 | < 0.001    | < 0.001  | < 0.001           |
| TamR              | < 0.001  |         | 0.371      | 0.227   | 0.114   | 0.001      | 0.392    | 0.001             |
| MDA-MB-468        | < 0.001  | 0.008   |            | 0.758   | 0.429   | 0.008      | 0.111    | 0.006             |
| HS578T            | < 0.001  | 0.133   | 0.203      |         | 0.603   | 0.016      | 0.063    | 0.012             |
| Sk-Br3            | < 0.001  | 0.768   | 0.022      | 0.249   |         | 0.079      | 0.034    | 0.065             |
| MDA-MB-231        | < 0.001  | 0.053   | 0.403      | 0.648   | 0.115   |            | < 0.001  | 0.912             |
| UACC3199          | < 0.001  | 0.698   | 0.026      | 0.285   | 0.930   | 0.135      |          | < 0.001           |
| T47D              | < 0.001  | 0.001   | 0.437      | 0.049   | 0.004   | 0.116      | 0.005    | miR-181d-5p (LSD) |
| Significance:     | p< 0.001 | p< 0.05 | p< 0.1     |         |         |            |          |                   |
