# Supplementary material for: Relationship of micro-RNA, mRNA and eIF Expression in Tamoxifen-Adapted MCF-7 Breast Cancer Cells: Impact of miR-1972 on Gene Expression, Proliferation and Migration
Source: MDPI journal article supplement (doi:10.3390/biom12070916), 2022-06-29
Supplement: s1 [file s1]

**Table S5 A.** Relative expression of eIFs as determined by Western blotting. Log<sub>2</sub>Fc relative to actin and MCF-7 is given.

| eIF                           | MCF-7 | Tam   | MDA-MB-468 | HS578T | SkBr3 | MDA-MB-231 | UACC3199 | T47D  |
|-------------------------------|-------|-------|------------|--------|-------|------------|----------|-------|
| eIF2 $\alpha$                 | -0.03 | -0.85 | -0.51      | -0.24  | 0.75  | 1.30       | 1.19     | 0.98  |
| PeIF2 $\alpha$                | -0.04 | 0.82  | -0.58      | 0.22   | 2.32  | 2.49       | 2.18     | -0.39 |
| peIF2 $\alpha$ /eIF2 $\alpha$ | -0.06 | 1.27  | -0.11      | 0.42   | 1.53  | 1.34       | 0.94     | -0.68 |
| eIF2A                         | 0.00  | -1.42 | -0.70      | -1.39  | 0.64  | -2.38      | -1.82    | -1.47 |
| eIF3A                         | -0.01 | 1.27  | -0.13      | 0.66   | 0.62  | 0.43       | 0.14     | -1.00 |
| eIF3D                         | -0.02 | -0.55 | -0.99      | -0.52  | 0.54  | 0.39       | -0.28    | -0.82 |
| eIF3H                         | -0.04 | 0.73  | -0.34      | 0.23   | 0.81  | 0.51       | 0.60     | -0.46 |
| eIF4A1                        | -0.02 | -1.15 | 0.05       | 1.44   | 0.25  | 0.88       | 1.78     | -0.86 |
| eIF4B                         | -0.08 | 0.21  | -0.96      | -0.91  | -0.56 | -2.10      | -1.72    | -1.87 |
| eIF4E                         | -0.01 | 0.17  | -0.28      | 0.90   | 3.04  | 1.44       | 2.23     | 0.42  |
| eIF4EBP1                      | -0.05 | -0.76 | -1.74      | -0.43  | -0.49 | -1.36      | 0.28     | -1.09 |
| peIF4EBP1                     | -0.04 | -1.91 | -0.70      | 0.63   | -3.87 | -0.43      | 0.65     | -0.54 |
| peIF4EBP1/eIF4EBP1            | -0.04 | -2.76 | 0.94       | 1.04   | -3.38 | 0.93       | 0.36     | 0.55  |
| eIF4G                         | -0.01 | 0.51  | -0.06      | 0.36   | 1.10  | 0.06       | 0.57     | -0.46 |
| eIF4H                         | 0.00  | -0.96 | -0.01      | -0.51  | 0.27  | -0.70      | -0.59    | -0.31 |
| eIF6                          | -0.06 | -1.56 | 2.06       | 0.58   | 3.25  | 2.48       | 1.70     | 0.49  |

**Table S5 B.** Statistical analysis of eIF expression in breast cancer cell lines. p-values as determined by ANOVA applying post-hoc analysis (LSD or Tamhane-T2) as indicated depending on equal variance. Significant values are color coded as shown at the end of the table.

| eIF2 $\alpha$ (T2) | MCF-7 | Tam   | MDA-MB-468 | HS578T | SkBr3 | MDA-MB-231 | UACC3199 | T47D                |
|--------------------|-------|-------|------------|--------|-------|------------|----------|---------------------|
| MCF-7              |       | 0.984 | 0.223      | 1.000  | 0.286 | 0.062      | 0.105    | 1.000               |
| Tam                | 0.623 |       | 1.000      | 0.998  | 0.618 | 0.481      | 0.340    | 0.942               |
| MDA-MB-468         | 1.000 | 0.977 |            | 0.993  | 0.084 | 0.094      | 0.064    | 0.990               |
| HS578T             | 1.000 | 1.000 | 1.000      |        | 0.136 | 0.037      | 0.054    | 0.999               |
| SkBr3              | 0.586 | 0.941 | 0.438      | 0.978  |       | 0.866      | 0.991    | 1.000               |
| MDA-MB-231         | 0.036 | 0.197 | 0.299      | 0.943  | 1.000 |            | 1.000    | 1.000               |
| UACC3199           | 0.723 | 0.985 | 0.552      | 0.991  | 1.000 | 1.000      |          | 1.000               |
| T47D               | 1.000 | 0.832 | 1.000      | 1.000  | 0.355 | 0.059      | 0.499    | peIF2 $\alpha$ (T2) |

| peIF2 $\alpha$ /eIF2 $\alpha$ (T2) | MCF-7   | Tam     | MDA-MB-468 | HS578T  | SkBr3   | MDA-MB-231 | UACC3199 | T47D        |
|------------------------------------|---------|---------|------------|---------|---------|------------|----------|-------------|
| MCF-7                              |         | 0.929   | 1.000      | 1.000   | 0.977   | 0.969      | 1.000    | 1.000       |
| Tam                                | < 0.001 |         | 0.991      | 1.000   | 1.000   | 1.000      | 1.000    | 0.890       |
| MDA-MB-468                         | 0.002   | 0.006   |            | 1.000   | 0.992   | 0.991      | 1.000    | 1.000       |
| HS578T                             | < 0.001 | 0.872   | 0.005      |         | 1.000   | 1.000      | 1.000    | 1.000       |
| SkBr3                              | 0.004   | < 0.001 | < 0.001    | < 0.001 |         | 1.000      | 1.000    | 0.893       |
| MDA-MB-231                         | < 0.001 | 0.001   | < 0.001    | < 0.001 | < 0.001 |            | 1.000    | 0.892       |
| UACC3199                           | < 0.001 | 0.112   | < 0.001    | 0.062   | < 0.001 | 0.019      |          | 0.989       |
| T47D                               | < 0.001 | 0.864   | 0.002      | 0.720   | < 0.001 | < 0.001    | 0.123    | eIF2A (LSD) |

| eIF3A (T2) | MCF-7 | Tam   | MDA-MB-468 | HS578T | SkBr3 | MDA-MB-231 | UACC3199 | T47D       |
|------------|-------|-------|------------|--------|-------|------------|----------|------------|
| MCF-7      |       | 0.990 | 1.000      | 0.781  | 0.001 | 0.891      | 1.000    | 0.826      |
| Tam        | 0.871 |       | 0.969      | 1.000  | 1.000 | 1.000      | 0.996    | 0.619      |
| MDA-MB-468 | 1.000 | 1.000 |            | 0.793  | 0.791 | 0.970      | 1.000    | 0.927      |
| HS578T     | 1.000 | 1.000 | 1.000      |        | 1.000 | 1.000      | 0.950    | 0.225      |
| SkBr3      | 1.000 | 0.910 | 0.986      | 0.994  |       | 1.000      | 0.590    | 0.390      |
| MDA-MB-231 | 0.955 | 0.391 | 0.996      | 0.995  | 1.000 |            | 0.999    | 0.383      |
| UACC3199   | 1.000 | 1.000 | 1.000      | 1.000  | 0.999 | 0.998      |          | 0.657      |
| T47D       | 1.000 | 1.000 | 1.000      | 1.000  | 0.973 | 0.983      | 1.000    | eIF3D (T2) |

| eIF3H (LSD) | MCF-7   | Tam   | MDA-MB-468 | HS578T | SkBr3   | MDA-MB-231 | UACC3199 | T47D        |
|-------------|---------|-------|------------|--------|---------|------------|----------|-------------|
| MCF-7       |         | 0.002 | 0.151      | 0.209  | < 0.001 | 0.012      | 0.005    | 0.047       |
| Tam         | 0.578   |       | < 0.001    | 0.046  | 0.751   | 0.373      | 0.581    | < 0.001     |
| MDA-MB-468  | 1.000   | 0.626 |            | 0.018  | < 0.001 | 0.001      | < 0.001  | 0.584       |
| HS578T      | 0.046   | 0.028 | 0.103      |        | 0.015   | 0.210      | 0.109    | 0.005       |
| SkBr3       | 0.992   | 0.344 | 0.999      | 0.097  |         | 0.197      | 0.352    | < 0.001     |
| MDA-MB-231  | 0.003   | 0.271 | 0.002      | 0.825  | 0.244   |            | 0.709    | < 0.001     |
| UACC3199    | < 0.001 | 0.125 | < 0.001    | 0.997  | 0.007   | 0.002      |          | < 0.001     |
| T47D        | 0.009   | 1.000 | 0.010      | 0.010  | 0.019   | < 0.001    | < 0.001  | eIF4A1 (T2) |

| eIF4B (T2) | MCF-7   | Tam   | MDA-MB468 | HS578T | SkBr3 | MDA-MB231 | UACC3199 | T47D       |
|------------|---------|-------|-----------|--------|-------|-----------|----------|------------|
| MCF-7      |         | 1.000 | 0.245     | 0.757  | 1.000 | 0.003     | 0.022    | 0.016      |
| Tam        | 0.918   |       | 0.718     | 0.686  | 0.986 | 0.254     | 0.168    | 0.177      |
| MDA-MB468  | 0.998   | 0.886 |           | 1.000  | 1.000 | 0.007     | 0.531    | 0.394      |
| HS578T     | 0.001   | 0.036 | 0.086     |        | 1.000 | 0.353     | 0.796    | 0.598      |
| SkBr3      | < 0.001 | 0.006 | < 0.001   | 0.002  |       | 0.338     | 0.568    | 0.445      |
| MDA-MB231  | 0.064   | 0.181 | 0.016     | 0.831  | 0.022 |           | 0.995    | 1.000      |
| UACC3199   | 0.016   | 0.054 | 0.002     | 0.123  | 0.406 | 0.580     |          | 1.000      |
| T47D       | 1.000   | 1.000 | 1.000     | 1.000  | 0.446 | 0.998     | 0.790    | eIF4E (T2) |

|               |       |       | MDA-MB- |        |       |            |          |                   |
|---------------|-------|-------|---------|--------|-------|------------|----------|-------------------|
| eIF4EBP1 (T2) | MCF-7 | Tam   | 468     | HS578T | SkBr3 | MDA-MB-231 | UACC3199 | T47D              |
| MCF-7         |       | 0.778 | 0.991   | 1.000  | 0.989 | 0.187      | 1.000    | 0.416             |
| Tam           | 0.224 |       | 1.000   | 1.000  | 0.999 | 0.809      | 0.459    | 0.993             |
| MDA-MB-468    | 0.999 | 0.881 |         | 0.998  | 1.000 | 1.000      | 0.987    | 1.000             |
| HS578T        | 0.741 | 0.334 | 0.985   |        | 1.000 | 0.979      | 0.995    | 0.999             |
| SkBr3         | 0.994 | 1.000 | 0.997   | 0.990  |       | 0.803      | 0.939    | 0.459             |
| MDA-MB-231    | 0.999 | 0.534 | 1.000   | 0.941  | 0.997 |            | 0.358    | 1.000             |
| UACC3199      | 0.998 | 0.323 | 0.925   | 1.000  | 0.979 | 0.979      |          | 0.835             |
| T47D          | 0.945 | 0.659 | 1.000   | 0.789  | 0.998 | 1.000      | 0.983    | peIF4EBP1<br>(T2) |

| p4EBP1 ratio (T2) | MDA-MB- |       |       |        |       |            |          |            |
|-------------------|---------|-------|-------|--------|-------|------------|----------|------------|
|                   | MCF-7   | Tam   | 468   | HS578T | SkBr3 | MDA-MB-231 | UACC3199 | T47D       |
| MCF-7             |         | 0.068 | 0.959 | 0.321  | 0.997 | 0.501      | 1.000    | 0.842      |
| Tam               | 1.000   |       | 0.120 | 0.168  | 1.000 | 0.064      | 0.210    | 0.131      |
| MDA-MB-468        | 1.000   | 1.000 |       | 1.000  | 0.984 | 1.000      | 1.000    | 1.000      |
| HS578T            | 1.000   | 1.000 | 0.587 |        | 0.991 | 1.000      | 1.000    | 0.979      |
| SkBr3             | 0.057   | 1.000 | 0.556 | 0.309  |       | 0.990      | 0.992    | 0.994      |
| MDA-MB-231        | 1.000   | 1.000 | 0.563 | 0.321  | 0.261 |            | 1.000    | 0.999      |
| UACC3199          | 0.598   | 1.000 | 0.549 | 0.295  | 0.228 | 0.244      |          | 1.000      |
| T47D              | 0.990   | 0.990 | 0.570 | 0.333  | 0.275 | 0.289      | 0.260    | eIF4G (T2) |

| eIF4H (LSD) | MDA-MB- |         |       |        |         |            |          |           |
|-------------|---------|---------|-------|--------|---------|------------|----------|-----------|
|             | MCF-7   | Tam     | 468   | HS578T | SkBr3   | MDA-MB-231 | UACC3199 | T47D      |
| MCF-7       |         | < 0.001 | 0.981 | 0.026  | 0.219   | 0.003      | 0.011    | 0.164     |
| Tam         | 0.008   |         | 0.001 | 0.088  | < 0.001 | 0.316      | 0.156    | 0.017     |
| MDA-MB-468  | 0.005   | 0.002   |       | 0.043  | 0.252   | 0.007      | 0.020    | 0.210     |
| HS578T      | 0.989   | 0.108   | 0.284 |        | 0.003   | 0.423      | 0.736    | 0.404     |
| SkBr3       | 0.002   | 0.002   | 0.374 | 0.024  |         | < 0.001    | 0.001    | 0.021     |
| MDA-MB-231  | 0.290   | 0.092   | 1.000 | 0.550  | 1.000   |            | 0.639    | 0.109     |
| UACC3199    | 0.002   | < 0.001 | 0.999 | 0.612  | 0.144   | 1.000      |          | 0.246     |
| T47D        | 1.000   | 0,955   | 0,966 | 1.000  | 0,755   | 0,969      | 1.000    | eIF6 (T2) |

|       |        |        |
|-------|--------|--------|
| p<0.1 | p<0.05 | p<0.01 |
|-------|--------|--------|
