# Supplementary material for: Relationship of micro-RNA, mRNA and eIF Expression in Tamoxifen-Adapted MCF-7 Breast Cancer Cells: Impact of miR-1972 on Gene Expression, Proliferation and Migration
Source: MDPI journal article supplement (doi:10.3390/biom12070916), 2022-06-29
Supplement: s1 [file s1]

| microRNA                        | logFC | AveExpr | t      | P.Value | adj.P.Val | B     |
|---------------------------------|-------|---------|--------|---------|-----------|-------|
| hsa-miR-181b-5p+hsa-miR-181d-5p | 5.91  | 3.55    | 44.94  | 0.00    | 0.01      | 5.23  |
| hsa-miR-1972                    | -3.66 | 1.46    | -33.02 | 0.00    | 0.01      | 4.12  |
| hsa-miR-375                     | -7.00 | 2.80    | -30.68 | 0.00    | 0.01      | 3.84  |
| hsa-miR-181a-3p                 | 5.85  | 3.51    | 21.64  | 0.00    | 0.02      | 2.44  |
| hsa-miR-455-5p                  | 6.38  | 3.83    | 17.89  | 0.00    | 0.03      | 1.65  |
| hsa-miR-10a-5p                  | 6.00  | 3.60    | 8.81   | 0.00    | 0.21      | -1.35 |
| hsa-miR-181a-5p                 | 3.09  | 10.05   | 8.59   | 0.00    | 0.21      | -1.46 |
| hsa-miR-135a-5p                 | -6.21 | 2.48    | -8.33  | 0.00    | 0.21      | -1.58 |
| hsa-miR-96-5p                   | -2.12 | 7.19    | -5.43  | 0.01    | 0.75      | -3.34 |
| hsa-miR-26b-5p                  | -2.13 | 8.90    | -5.07  | 0.01    | 0.76      | -3.61 |
| hsa-miR-365a-3p+hsa-miR-365b-3p | -1.71 | 9.83    | -5.08  | 0.01    | 0.76      | -3.60 |
| hsa-let-7i-5p                   | -1.22 | 11.12   | -4.08  | 0.02    | 0.80      | -4.44 |
| hsa-miR-873-3p                  | 3.72  | 2.92    | 4.04   | 0.02    | 0.80      | -4.47 |
| hsa-miR-450a-5p                 | -2.24 | 7.72    | -3.97  | 0.02    | 0.80      | -4.54 |
| hsa-miR-98-5p                   | -1.65 | 9.86    | -4.16  | 0.02    | 0.80      | -4.36 |
| hsa-miR-193a-5p+hsa-miR-193b-5p | -3.24 | 1.30    | -4.53  | 0.01    | 0.80      | -4.05 |
| hsa-miR-342-3p                  | -3.35 | 10.91   | -4.05  | 0.02    | 0.80      | -4.47 |
| hsa-miR-32-5p                   | -1.94 | 10.32   | -4.39  | 0.02    | 0.80      | -4.17 |
| hsa-miR-15b-5p                  | -1.10 | 12.48   | -4.05  | 0.02    | 0.80      | -4.47 |
| hsa-miR-1260a                   | -1.22 | 7.65    | -4.18  | 0.02    | 0.80      | -4.34 |
| hsa-miR-7-5p                    | -1.91 | 9.93    | -3.99  | 0.02    | 0.80      | -4.52 |
| hsa-miR-9-5p                    | -3.04 | 6.70    | -4.71  | 0.01    | 0.80      | -3.90 |
| hsa-miR-340-5p                  | -2.10 | 7.89    | -3.74  | 0.03    | 0.91      | -4.76 |
| hsa-miR-1257                    | 0.00  | 0.00    | 0.00   | 1.00    | 1.00      | -8.35 |
| hsa-miR-656-3p                  | 0.00  | 0.00    | 0.00   | 1.00    | 1.00      | -8.35 |
| hsa-miR-579-5p                  | 0.00  | 0.00    | 0.00   | 1.00    | 1.00      | -8.35 |
| hsa-miR-574-5p                  | -0.87 | 5.19    | -1.18  | 0.31    | 1.00      | -7.60 |
| hsa-miR-4755-5p                 | 0.00  | 0.00    | 0.00   | 1.00    | 1.00      | -8.35 |
| hsa-miR-1269a                   | 0.00  | 0.00    | 0.00   | 1.00    | 1.00      | -8.35 |

|                   |       |       |       |      |      |       |
|-------------------|-------|-------|-------|------|------|-------|
| hsa-miR-503-5p    | -0.59 | 7.11  | -1.03 | 0.37 | 1.00 | -7.76 |
| hsa-miR-188-5p    | 0.24  | 2.10  | 0.12  | 0.91 | 1.00 | -8.35 |
| hsa-miR-138-5p    | 0.00  | 0.00  | 0.00  | 1.00 | 1.00 | -8.35 |
| hsa-miR-212-3p    | 0.00  | 0.00  | 0.00  | 1.00 | 1.00 | -8.35 |
| hsa-miR-302b-3p   | 0.00  | 0.00  | 0.00  | 1.00 | 1.00 | -8.35 |
| hsa-miR-608       | 0.00  | 0.00  | 0.00  | 1.00 | 1.00 | -8.35 |
| hsa-miR-2053      | 0.00  | 0.00  | 0.00  | 1.00 | 1.00 | -8.35 |
| hsa-miR-302d-3p   | 0.00  | 0.00  | 0.00  | 1.00 | 1.00 | -8.35 |
| hsa-miR-28-5p     | 0.31  | 8.12  | 0.44  | 0.68 | 1.00 | -8.23 |
| hsa-miR-215-5p    | 0.00  | 0.00  | 0.00  | 1.00 | 1.00 | -8.35 |
| hsa-miR-379-5p    | 1.01  | 0.61  | 0.83  | 0.46 | 1.00 | -7.95 |
| hsa-miR-30c-5p    | -0.33 | 4.93  | -0.35 | 0.75 | 1.00 | -8.28 |
| hsa-miR-1307-3p   | -0.63 | 1.42  | -0.33 | 0.76 | 1.00 | -8.28 |
| hsa-miR-423-3p    | -2.16 | 3.74  | -1.20 | 0.30 | 1.00 | -7.58 |
| hsa-miR-1258      | 0.00  | 0.00  | 0.00  | 1.00 | 1.00 | -8.35 |
| hsa-miR-518f-3p   | 0.00  | 0.00  | 0.00  | 1.00 | 1.00 | -8.35 |
| hsa-miR-593-3p    | 0.00  | 0.00  | 0.00  | 1.00 | 1.00 | -8.35 |
| hsa-miR-584-5p    | 0.00  | 0.00  | 0.00  | 1.00 | 1.00 | -8.35 |
| hsa-miR-1234-3p   | 0.00  | 0.00  | 0.00  | 1.00 | 1.00 | -8.35 |
| hsa-miR-329-5p    | 0.00  | 0.00  | 0.00  | 1.00 | 1.00 | -8.35 |
| hsa-miR-127-3p    | 0.00  | 0.00  | 0.00  | 1.00 | 1.00 | -8.35 |
| hsa-miR-1307-5p   | 0.00  | 0.00  | 0.00  | 1.00 | 1.00 | -8.35 |
| hsa-miR-575       | 0.00  | 0.00  | 0.00  | 1.00 | 1.00 | -8.35 |
| hsa-miR-125b-5p   | 0.87  | 8.98  | 1.79  | 0.16 | 1.00 | -6.90 |
| hsa-miR-216b-5p   | 0.00  | 0.00  | 0.00  | 1.00 | 1.00 | -8.35 |
| hsa-miR-191-5p    | -0.13 | 12.08 | -0.18 | 0.87 | 1.00 | -8.33 |
| hsa-miR-29a-3p    | 1.19  | 8.04  | 2.66  | 0.07 | 1.00 | -5.87 |
| hsa-miR-1298-5p   | 0.00  | 0.00  | 0.00  | 1.00 | 1.00 | -8.35 |
| hsa-miR-320a      | 0.00  | 0.00  | 0.00  | 1.00 | 1.00 | -8.35 |
| hsa-miR-181b-2-3p | 0.00  | 0.00  | 0.00  | 1.00 | 1.00 | -8.35 |

|                  |       |       |       |      |      |       |
|------------------|-------|-------|-------|------|------|-------|
| hsa-miR-140-3p   | 0.00  | 0.00  | 0.00  | 1.00 | 1.00 | -8.35 |
| hsa-miR-149-5p   | -0.54 | 8.27  | -0.81 | 0.47 | 1.00 | -7.97 |
| hsa-miR-371a-5p  | 0.00  | 0.00  | 0.00  | 1.00 | 1.00 | -8.35 |
| hsa-miR-548i     | 0.00  | 0.00  | 0.00  | 1.00 | 1.00 | -8.35 |
| hsa-miR-548ah-5p | 0.00  | 0.00  | 0.00  | 1.00 | 1.00 | -8.35 |
| hsa-miR-380-3p   | 0.00  | 0.00  | 0.00  | 1.00 | 1.00 | -8.35 |
| hsa-miR-3934-5p  | 0.00  | 0.00  | 0.00  | 1.00 | 1.00 | -8.35 |
| hsa-miR-100-5p   | 0.00  | 0.00  | 0.00  | 1.00 | 1.00 | -8.35 |
| hsa-miR-325      | 0.00  | 0.00  | 0.00  | 1.00 | 1.00 | -8.35 |
| hsa-miR-3180     | 0.00  | 0.00  | 0.00  | 1.00 | 1.00 | -8.35 |
| hsa-miR-374a-5p  | -1.41 | 10.77 | -2.36 | 0.09 | 1.00 | -6.21 |
| hsa-miR-651-5p   | 0.00  | 0.00  | 0.00  | 1.00 | 1.00 | -8.35 |
| hsa-miR-200c-3p  | -0.43 | 12.93 | -1.50 | 0.22 | 1.00 | -7.24 |
| hsa-miR-192-5p   | 0.00  | 0.00  | 0.00  | 1.00 | 1.00 | -8.35 |
| hsa-miR-770-5p   | 0.00  | 0.00  | 0.00  | 1.00 | 1.00 | -8.35 |
| hsa-miR-129-2-3p | 0.00  | 0.00  | 0.00  | 1.00 | 1.00 | -8.35 |
| hsa-miR-3144-3p  | 0.00  | 0.00  | 0.00  | 1.00 | 1.00 | -8.35 |
| hsa-miR-6724-5p  | 0.00  | 0.00  | 0.00  | 1.00 | 1.00 | -8.35 |
| hsa-miR-374a-3p  | 0.00  | 0.00  | 0.00  | 1.00 | 1.00 | -8.35 |
| hsa-miR-103a-3p  | 0.00  | 0.00  | 0.00  | 1.00 | 1.00 | -8.35 |
| hsa-miR-549a     | 0.00  | 0.00  | 0.00  | 1.00 | 1.00 | -8.35 |
| hsa-miR-1236-3p  | 0.00  | 0.00  | 0.00  | 1.00 | 1.00 | -8.35 |
| hsa-miR-139-3p   | 0.00  | 0.00  | 0.00  | 1.00 | 1.00 | -8.35 |
| hsa-miR-595      | 0.00  | 0.00  | 0.00  | 1.00 | 1.00 | -8.35 |
| hsa-miR-1203     | 0.00  | 0.00  | 0.00  | 1.00 | 1.00 | -8.35 |
| hsa-miR-147a     | 0.00  | 0.00  | 0.00  | 1.00 | 1.00 | -8.35 |
| hsa-miR-1261     | 0.00  | 0.00  | 0.00  | 1.00 | 1.00 | -8.35 |
| hsa-miR-519d-3p  | 0.00  | 0.00  | 0.00  | 1.00 | 1.00 | -8.35 |
| hsa-miR-620      | 0.00  | 0.00  | 0.00  | 1.00 | 1.00 | -8.35 |
| hsa-miR-561-5p   | 0.00  | 0.00  | 0.00  | 1.00 | 1.00 | -8.35 |

|                              |       |       |       |      |      |       |
|------------------------------|-------|-------|-------|------|------|-------|
| hsa-miR-3144-5p              | 0.00  | 0.00  | 0.00  | 1.00 | 1.00 | -8.35 |
| hsa-miR-644a                 | 0.00  | 0.00  | 0.00  | 1.00 | 1.00 | -8.35 |
| hsa-let-7b-5p                | -0.50 | 11.43 | -2.44 | 0.08 | 1.00 | -6.12 |
| hsa-miR-193a-3p              | 0.00  | 0.00  | 0.00  | 1.00 | 1.00 | -8.35 |
| hsa-miR-141-3p               | -0.73 | 11.36 | -2.35 | 0.09 | 1.00 | -6.22 |
| hsa-miR-3182                 | 0.00  | 0.00  | 0.00  | 1.00 | 1.00 | -8.35 |
| hsa-miR-339-5p               | 0.00  | 0.00  | 0.00  | 1.00 | 1.00 | -8.35 |
| hsa-miR-371b-5p              | 0.00  | 0.00  | 0.00  | 1.00 | 1.00 | -8.35 |
| hsa-miR-92b-3p               | 0.00  | 0.00  | 0.00  | 1.00 | 1.00 | -8.35 |
| hsa-miR-449c-5p              | 0.00  | 0.00  | 0.00  | 1.00 | 1.00 | -8.35 |
| hsa-miR-1279                 | 0.00  | 0.00  | 0.00  | 1.00 | 1.00 | -8.35 |
| hsa-miR-155-5p               | 0.00  | 0.00  | 0.00  | 1.00 | 1.00 | -8.35 |
| hsa-miR-1205                 | 0.00  | 0.00  | 0.00  | 1.00 | 1.00 | -8.35 |
| hsa-miR-941                  | 0.00  | 0.00  | 0.00  | 1.00 | 1.00 | -8.35 |
| hsa-miR-483-3p               | 0.00  | 0.00  | 0.00  | 1.00 | 1.00 | -8.35 |
| hsa-miR-548ai+hsa-miR-570-5p | 0.00  | 0.00  | 0.00  | 1.00 | 1.00 | -8.35 |
| hsa-miR-891b                 | 0.00  | 0.00  | 0.00  | 1.00 | 1.00 | -8.35 |
| hsa-miR-489-3p               | -2.74 | 7.76  | -1.90 | 0.14 | 1.00 | -6.76 |
| hsa-miR-503-3p               | 0.00  | 0.00  | 0.00  | 1.00 | 1.00 | -8.35 |
| hsa-miR-4451                 | 0.00  | 0.00  | 0.00  | 1.00 | 1.00 | -8.35 |
| hsa-miR-142-3p               | -3.00 | 1.20  | -1.44 | 0.23 | 1.00 | -7.31 |
| hsa-let-7c-5p                | 0.52  | 8.64  | 1.05  | 0.36 | 1.00 | -7.74 |
| hsa-miR-1193                 | 0.00  | 0.00  | 0.00  | 1.00 | 1.00 | -8.35 |
| hsa-miR-542-5p               | 0.00  | 0.00  | 0.00  | 1.00 | 1.00 | -8.35 |
| hsa-miR-217                  | 0.00  | 0.00  | 0.00  | 1.00 | 1.00 | -8.35 |
| hsa-miR-125a-3p              | 0.00  | 0.00  | 0.00  | 1.00 | 1.00 | -8.35 |
| hsa-miR-5196-5p              | 0.00  | 0.00  | 0.00  | 1.00 | 1.00 | -8.35 |
| hsa-miR-1304-5p              | 0.00  | 0.00  | 0.00  | 1.00 | 1.00 | -8.35 |
| hsa-miR-520d-3p              | 0.00  | 0.00  | 0.00  | 1.00 | 1.00 | -8.35 |
| hsa-miR-34b-3p               | 0.00  | 0.00  | 0.00  | 1.00 | 1.00 | -8.35 |

|                               |       |      |       |      |      |       |
|-------------------------------|-------|------|-------|------|------|-------|
| hsa-miR-548aa+hsa-miR-548t-3p | 0.00  | 0.00 | 0.00  | 1.00 | 1.00 | -8.35 |
| hsa-miR-564                   | 0.00  | 0.00 | 0.00  | 1.00 | 1.00 | -8.35 |
| hsa-miR-488-3p                | 0.00  | 0.00 | 0.00  | 1.00 | 1.00 | -8.35 |
| hsa-miR-654-5p                | 0.00  | 0.00 | 0.00  | 1.00 | 1.00 | -8.35 |
| hsa-miR-30b-5p                | -0.75 | 7.46 | -1.66 | 0.18 | 1.00 | -7.05 |
| hsa-miR-592                   | 0.00  | 0.00 | 0.00  | 1.00 | 1.00 | -8.35 |
| hsa-miR-1287-5p               | -1.96 | 0.78 | -1.44 | 0.23 | 1.00 | -7.31 |
| hsa-miR-101-3p                | 0.00  | 0.00 | 0.00  | 1.00 | 1.00 | -8.35 |
| hsa-miR-509-3p                | 0.00  | 0.00 | 0.00  | 1.00 | 1.00 | -8.35 |
| hsa-miR-590-5p                | -1.72 | 5.78 | -3.47 | 0.03 | 1.00 | -5.02 |
| hsa-miR-675-5p                | 0.00  | 0.00 | 0.00  | 1.00 | 1.00 | -8.35 |
| hsa-miR-433-5p                | 0.00  | 0.00 | 0.00  | 1.00 | 1.00 | -8.35 |
| hsa-miR-571                   | 0.00  | 0.00 | 0.00  | 1.00 | 1.00 | -8.35 |
| hsa-miR-591                   | 0.00  | 0.00 | 0.00  | 1.00 | 1.00 | -8.35 |
| hsa-miR-889-3p                | 0.00  | 0.00 | 0.00  | 1.00 | 1.00 | -8.35 |
| hsa-miR-587                   | 0.00  | 0.00 | 0.00  | 1.00 | 1.00 | -8.35 |
| hsa-miR-499a-3p               | 0.00  | 0.00 | 0.00  | 1.00 | 1.00 | -8.35 |
| hsa-miR-1226-3p               | 0.00  | 0.00 | 0.00  | 1.00 | 1.00 | -8.35 |
| hsa-miR-34c-3p                | 0.00  | 0.00 | 0.00  | 1.00 | 1.00 | -8.35 |
| hsa-miR-424-5p                | -0.92 | 7.96 | -1.85 | 0.15 | 1.00 | -6.83 |
| hsa-miR-1266-5p               | 0.00  | 0.00 | 0.00  | 1.00 | 1.00 | -8.35 |
| hsa-miR-520a-5p               | 0.00  | 0.00 | 0.00  | 1.00 | 1.00 | -8.35 |
| hsa-miR-548ar-5p              | 0.00  | 0.00 | 0.00  | 1.00 | 1.00 | -8.35 |
| hsa-miR-640                   | 0.00  | 0.00 | 0.00  | 1.00 | 1.00 | -8.35 |
| hsa-miR-877-5p                | 0.00  | 0.00 | 0.00  | 1.00 | 1.00 | -8.35 |
| hsa-miR-1293                  | 0.00  | 0.00 | 0.00  | 1.00 | 1.00 | -8.35 |
| hsa-miR-515-3p                | 0.00  | 0.00 | 0.00  | 1.00 | 1.00 | -8.35 |
| hsa-miR-190a-3p               | 0.00  | 0.00 | 0.00  | 1.00 | 1.00 | -8.35 |
| hsa-miR-302c-3p               | 0.00  | 0.00 | 0.00  | 1.00 | 1.00 | -8.35 |
| hsa-miR-214-3p                | 0.00  | 0.00 | 0.00  | 1.00 | 1.00 | -8.35 |

|                                 |       |       |       |      |      |       |
|---------------------------------|-------|-------|-------|------|------|-------|
| hsa-miR-516a-3p+hsa-miR-516b-3p | 0.00  | 0.00  | 0.00  | 1.00 | 1.00 | -8.35 |
| hsa-miR-555                     | 0.00  | 0.00  | 0.00  | 1.00 | 1.00 | -8.35 |
| hsa-miR-339-3p                  | 0.00  | 0.00  | 0.00  | 1.00 | 1.00 | -8.35 |
| hsa-miR-21-5p                   | -0.03 | 15.17 | -0.07 | 0.95 | 1.00 | -8.35 |
| hsa-miR-4531                    | 0.00  | 0.00  | 0.00  | 1.00 | 1.00 | -8.35 |
| hsa-miR-373-3p                  | 0.00  | 0.00  | 0.00  | 1.00 | 1.00 | -8.35 |
| hsa-miR-490-3p                  | 0.00  | 0.00  | 0.00  | 1.00 | 1.00 | -8.35 |
| hsa-miR-1253                    | 0.00  | 0.00  | 0.00  | 1.00 | 1.00 | -8.35 |
| hsa-miR-665                     | 0.00  | 0.00  | 0.00  | 1.00 | 1.00 | -8.35 |
| hsa-miR-4443                    | 1.47  | 3.13  | 0.89  | 0.43 | 1.00 | -7.89 |
| hsa-miR-628-3p                  | 0.00  | 0.00  | 0.00  | 1.00 | 1.00 | -8.35 |
| hsa-miR-616-3p                  | 0.00  | 0.00  | 0.00  | 1.00 | 1.00 | -8.35 |
| hsa-miR-3928-3p                 | 0.00  | 0.00  | 0.00  | 1.00 | 1.00 | -8.35 |
| hsa-miR-196a-3p                 | 0.00  | 0.00  | 0.00  | 1.00 | 1.00 | -8.35 |
| hsa-miR-548a1                   | 0.00  | 0.00  | 0.00  | 1.00 | 1.00 | -8.35 |
| hsa-miR-1287-3p                 | 0.00  | 0.00  | 0.00  | 1.00 | 1.00 | -8.35 |
| hsa-miR-1250-5p                 | 0.00  | 0.00  | 0.00  | 1.00 | 1.00 | -8.35 |
| hsa-let-7a-5p                   | -0.81 | 13.83 | -2.36 | 0.09 | 1.00 | -6.21 |
| hsa-miR-3158-3p                 | 0.00  | 0.00  | 0.00  | 1.00 | 1.00 | -8.35 |
| hsa-miR-1246                    | 0.00  | 0.00  | 0.00  | 1.00 | 1.00 | -8.35 |
| hsa-miR-190b                    | 0.00  | 0.00  | 0.00  | 1.00 | 1.00 | -8.35 |
| hsa-miR-450b-3p                 | 0.00  | 0.00  | 0.00  | 1.00 | 1.00 | -8.35 |
| hsa-miR-1827                    | 0.00  | 0.00  | 0.00  | 1.00 | 1.00 | -8.35 |
| hsa-miR-423-5p                  | -0.46 | 4.76  | -0.62 | 0.57 | 1.00 | -8.12 |
| hsa-miR-499b-3p                 | 0.00  | 0.00  | 0.00  | 1.00 | 1.00 | -8.35 |
| hsa-miR-603                     | 0.00  | 0.00  | 0.00  | 1.00 | 1.00 | -8.35 |
| hsa-miR-885-3p                  | 0.00  | 0.00  | 0.00  | 1.00 | 1.00 | -8.35 |
| hsa-miR-381-3p                  | 0.00  | 0.00  | 0.00  | 1.00 | 1.00 | -8.35 |
| hsa-miR-4536-5p                 | 0.00  | 0.00  | 0.00  | 1.00 | 1.00 | -8.35 |
| hsa-miR-671-5p                  | 0.00  | 0.00  | 0.00  | 1.00 | 1.00 | -8.35 |

|                                 |       |      |       |      |      |       |
|---------------------------------|-------|------|-------|------|------|-------|
| hsa-miR-520c-3p                 | 0.00  | 0.00 | 0.00  | 1.00 | 1.00 | -8.35 |
| hsa-miR-520g-3p                 | 0.00  | 0.00 | 0.00  | 1.00 | 1.00 | -8.35 |
| hsa-miR-2682-5p                 | 0.00  | 0.00 | 0.00  | 1.00 | 1.00 | -8.35 |
| hsa-miR-509-3-5p                | 0.00  | 0.00 | 0.00  | 1.00 | 1.00 | -8.35 |
| hsa-miR-4787-5p                 | 0.00  | 0.00 | 0.00  | 1.00 | 1.00 | -8.35 |
| hsa-miR-1289                    | 0.00  | 0.00 | 0.00  | 1.00 | 1.00 | -8.35 |
| hsa-miR-1268a                   | 0.00  | 0.00 | 0.00  | 1.00 | 1.00 | -8.35 |
| hsa-miR-604                     | 0.00  | 0.00 | 0.00  | 1.00 | 1.00 | -8.35 |
| hsa-miR-302e                    | 0.00  | 0.00 | 0.00  | 1.00 | 1.00 | -8.35 |
| hsa-miR-19a-3p                  | -1.12 | 6.16 | -1.05 | 0.36 | 1.00 | -7.74 |
| hsa-miR-122-5p                  | 0.00  | 0.00 | 0.00  | 1.00 | 1.00 | -8.35 |
| hsa-miR-499b-5p                 | 0.00  | 0.00 | 0.00  | 1.00 | 1.00 | -8.35 |
| hsa-miR-1273c                   | 0.00  | 0.00 | 0.00  | 1.00 | 1.00 | -8.35 |
| hsa-miR-1206                    | -2.83 | 1.13 | -1.44 | 0.23 | 1.00 | -7.31 |
| hsa-miR-513a-5p                 | 0.00  | 0.00 | 0.00  | 1.00 | 1.00 | -8.35 |
| hsa-miR-589-5p                  | 0.00  | 0.00 | 0.00  | 1.00 | 1.00 | -8.35 |
| hsa-miR-382-5p                  | 0.00  | 0.00 | 0.00  | 1.00 | 1.00 | -8.35 |
| hsa-miR-3180-3p                 | 0.00  | 0.00 | 0.00  | 1.00 | 1.00 | -8.35 |
| hsa-miR-758-3p+hsa-miR-411-3p   | 0.00  | 0.00 | 0.00  | 1.00 | 1.00 | -8.35 |
| hsa-miR-376a-2-5p               | 0.00  | 0.00 | 0.00  | 1.00 | 1.00 | -8.35 |
| hsa-miR-577                     | 0.00  | 0.00 | 0.00  | 1.00 | 1.00 | -8.35 |
| hsa-miR-135b-5p                 | -2.83 | 1.13 | -1.44 | 0.23 | 1.00 | -7.31 |
| hsa-miR-140-5p                  | -2.04 | 5.01 | -2.37 | 0.09 | 1.00 | -6.21 |
| hsa-miR-5196-3p+hsa-miR-6732-3p | -1.73 | 0.69 | -1.44 | 0.23 | 1.00 | -7.31 |
| hsa-miR-6721-5p                 | 2.26  | 1.36 | 1.30  | 0.27 | 1.00 | -7.47 |
| hsa-miR-1202                    | 0.00  | 0.00 | 0.00  | 1.00 | 1.00 | -8.35 |
| hsa-miR-148a-3p                 | -1.61 | 8.89 | -2.87 | 0.05 | 1.00 | -5.64 |
| hsa-miR-190a-5p                 | -1.26 | 0.50 | -1.44 | 0.23 | 1.00 | -7.31 |
| hsa-miR-139-5p                  | 0.00  | 0.00 | 0.00  | 1.00 | 1.00 | -8.35 |
| hsa-miR-216a-5p                 | 0.00  | 0.00 | 0.00  | 1.00 | 1.00 | -8.35 |

|                                |       |       |       |      |      |       |
|--------------------------------|-------|-------|-------|------|------|-------|
| hsa-miR-302f                   | 0.00  | 0.00  | 0.00  | 1.00 | 1.00 | -8.35 |
| hsa-miR-548b-3p                | 0.00  | 0.00  | 0.00  | 1.00 | 1.00 | -8.35 |
| hsa-miR-541-3p                 | 0.00  | 0.00  | 0.00  | 1.00 | 1.00 | -8.35 |
| hsa-miR-372-3p                 | 0.00  | 0.00  | 0.00  | 1.00 | 1.00 | -8.35 |
| hsa-miR-324-5p                 | -1.22 | 7.29  | -3.12 | 0.04 | 1.00 | -5.37 |
| hsa-miR-3202                   | 0.00  | 0.00  | 0.00  | 1.00 | 1.00 | -8.35 |
| hsa-miR-409-3p                 | 0.00  | 0.00  | 0.00  | 1.00 | 1.00 | -8.35 |
| hsa-miR-492                    | 0.00  | 0.00  | 0.00  | 1.00 | 1.00 | -8.35 |
| hsa-miR-500a-5p+hsa-miR-501-5p | -0.06 | 2.39  | -0.03 | 0.98 | 1.00 | -8.35 |
| hsa-miR-1469                   | 0.00  | 0.00  | 0.00  | 1.00 | 1.00 | -8.35 |
| hsa-miR-328-3p                 | 0.00  | 0.00  | 0.00  | 1.00 | 1.00 | -8.35 |
| hsa-miR-940                    | 0.00  | 0.00  | 0.00  | 1.00 | 1.00 | -8.35 |
| hsa-miR-31-5p                  | 0.00  | 0.00  | 0.00  | 1.00 | 1.00 | -8.35 |
| hsa-miR-518b                   | 0.00  | 0.00  | 0.00  | 1.00 | 1.00 | -8.35 |
| hsa-miR-615-5p                 | 0.00  | 0.00  | 0.00  | 1.00 | 1.00 | -8.35 |
| hsa-miR-1276                   | 0.00  | 0.00  | 0.00  | 1.00 | 1.00 | -8.35 |
| hsa-miR-548e-3p                | 0.00  | 0.00  | 0.00  | 1.00 | 1.00 | -8.35 |
| hsa-miR-1908-3p                | 0.00  | 0.00  | 0.00  | 1.00 | 1.00 | -8.35 |
| hsa-miR-3150b-3p               | 0.00  | 0.00  | 0.00  | 1.00 | 1.00 | -8.35 |
| hsa-miR-504-5p                 | 1.33  | 0.80  | 0.83  | 0.46 | 1.00 | -7.95 |
| hsa-miR-619-3p                 | 0.00  | 0.00  | 0.00  | 1.00 | 1.00 | -8.35 |
| hsa-miR-363-5p                 | 0.00  | 0.00  | 0.00  | 1.00 | 1.00 | -8.35 |
| hsa-miR-4435                   | 0.00  | 0.00  | 0.00  | 1.00 | 1.00 | -8.35 |
| hsa-miR-890                    | 0.00  | 0.00  | 0.00  | 1.00 | 1.00 | -8.35 |
| hsa-miR-520f-3p                | 0.00  | 0.00  | 0.00  | 1.00 | 1.00 | -8.35 |
| hsa-miR-151a-3p                | -0.12 | 8.11  | -0.21 | 0.84 | 1.00 | -8.33 |
| hsa-miR-194-5p                 | 0.32  | 6.62  | 0.58  | 0.60 | 1.00 | -8.15 |
| hsa-miR-218-5p                 | -3.12 | 4.20  | -1.62 | 0.19 | 1.00 | -7.10 |
| hsa-miR-15a-5p                 | -0.57 | 11.85 | -1.49 | 0.22 | 1.00 | -7.25 |
| hsa-miR-539-5p                 | 0.00  | 0.00  | 0.00  | 1.00 | 1.00 | -8.35 |



|                                  |       |       |       |      |      |       |
|----------------------------------|-------|-------|-------|------|------|-------|
| hsa-miR-493-3p                   | 0.00  | 0.00  | 0.00  | 1.00 | 1.00 | -8.35 |
| hsa-miR-4454+hsa-miR-7975        | -0.22 | 12.79 | -0.51 | 0.64 | 1.00 | -8.19 |
| hsa-miR-3161                     | 0.00  | 0.00  | 0.00  | 1.00 | 1.00 | -8.35 |
| hsa-miR-4521                     | 0.00  | 0.00  | 0.00  | 1.00 | 1.00 | -8.35 |
| hsa-miR-422a                     | 0.00  | 0.00  | 0.00  | 1.00 | 1.00 | -8.35 |
| hsa-miR-374c-5p                  | 0.00  | 0.00  | 0.00  | 1.00 | 1.00 | -8.35 |
| hsa-miR-551a                     | 0.00  | 0.00  | 0.00  | 1.00 | 1.00 | -8.35 |
| hsa-miR-874-5p                   | 0.00  | 0.00  | 0.00  | 1.00 | 1.00 | -8.35 |
| hsa-miR-1180-3p                  | -0.18 | 8.47  | -1.38 | 0.25 | 1.00 | -7.38 |
| hsa-miR-579-3p                   | 0.00  | 0.00  | 0.00  | 1.00 | 1.00 | -8.35 |
| hsa-miR-128-1-5p                 | 0.00  | 0.00  | 0.00  | 1.00 | 1.00 | -8.35 |
| hsa-miR-610                      | 0.00  | 0.00  | 0.00  | 1.00 | 1.00 | -8.35 |
| hsa-miR-3136-5p                  | 0.00  | 0.00  | 0.00  | 1.00 | 1.00 | -8.35 |
| hsa-miR-671-3p                   | 0.00  | 0.00  | 0.00  | 1.00 | 1.00 | -8.35 |
| hsa-miR-219a-1-3p                | 0.00  | 0.00  | 0.00  | 1.00 | 1.00 | -8.35 |
| hsa-miR-1291                     | 0.00  | 0.00  | 0.00  | 1.00 | 1.00 | -8.35 |
| hsa-miR-342-5p                   | -2.92 | 1.17  | -1.44 | 0.23 | 1.00 | -7.31 |
| hsa-miR-320b                     | 0.00  | 0.00  | 0.00  | 1.00 | 1.00 | -8.35 |
| hsa-miR-195-5p                   | -2.56 | 2.16  | -1.38 | 0.25 | 1.00 | -7.38 |
| hsa-miR-202-3p                   | 0.00  | 0.00  | 0.00  | 1.00 | 1.00 | -8.35 |
| hsa-miR-152-3p                   | -1.91 | 0.76  | -1.44 | 0.23 | 1.00 | -7.31 |
| hsa-miR-519b-5p+hsa-miR-519c-5p+ |       |       |       |      |      |       |
| hsa-miR-523-5p+hsa-miR-518e-5p+  |       |       |       |      |      |       |
| hsa-miR-522-5p+hsa-miR-519a-5p   | 0.00  | 0.00  | 0.00  | 1.00 | 1.00 | -8.35 |
| hsa-miR-617                      | 0.00  | 0.00  | 0.00  | 1.00 | 1.00 | -8.35 |
| hsa-miR-374b-5p                  | -0.96 | 8.42  | -1.87 | 0.15 | 1.00 | -6.80 |
| hsa-miR-92a-3p                   | -1.14 | 3.56  | -0.65 | 0.55 | 1.00 | -8.10 |
| hsa-miR-2117                     | 0.00  | 0.00  | 0.00  | 1.00 | 1.00 | -8.35 |
| hsa-miR-567                      | 0.00  | 0.00  | 0.00  | 1.00 | 1.00 | -8.35 |
| hsa-miR-24-3p                    | -0.48 | 8.58  | -0.91 | 0.42 | 1.00 | -7.88 |

|                              |       |       |       |      |      |       |
|------------------------------|-------|-------|-------|------|------|-------|
| hsa-miR-524-3p               | 0.00  | 0.00  | 0.00  | 1.00 | 1.00 | -8.35 |
| hsa-miR-515-5p               | 0.00  | 0.00  | 0.00  | 1.00 | 1.00 | -8.35 |
| hsa-miR-4458                 | 0.00  | 0.00  | 0.00  | 1.00 | 1.00 | -8.35 |
| hsa-miR-3164                 | 0.00  | 0.00  | 0.00  | 1.00 | 1.00 | -8.35 |
| hsa-miR-519e-3p              | 0.00  | 0.00  | 0.00  | 1.00 | 1.00 | -8.35 |
| hsa-miR-98-3p                | 0.00  | 0.00  | 0.00  | 1.00 | 1.00 | -8.35 |
| hsa-miR-767-3p               | 0.00  | 0.00  | 0.00  | 1.00 | 1.00 | -8.35 |
| hsa-miR-606                  | 0.00  | 0.00  | 0.00  | 1.00 | 1.00 | -8.35 |
| hsa-miR-365b-5p              | 0.00  | 0.00  | 0.00  | 1.00 | 1.00 | -8.35 |
| hsa-miR-3690                 | 0.00  | 0.00  | 0.00  | 1.00 | 1.00 | -8.35 |
| hsa-miR-505-3p               | -1.39 | 3.86  | -0.60 | 0.59 | 1.00 | -8.13 |
| hsa-miR-1264                 | 0.00  | 0.00  | 0.00  | 1.00 | 1.00 | -8.35 |
| hsa-miR-519b-3p              | 0.00  | 0.00  | 0.00  | 1.00 | 1.00 | -8.35 |
| hsa-miR-596                  | 0.00  | 0.00  | 0.00  | 1.00 | 1.00 | -8.35 |
| hsa-miR-105-5p               | 0.00  | 0.00  | 0.00  | 1.00 | 1.00 | -8.35 |
| hsa-miR-576-5p               | 0.00  | 0.00  | 0.00  | 1.00 | 1.00 | -8.35 |
| hsa-miR-892a                 | 0.00  | 0.00  | 0.00  | 1.00 | 1.00 | -8.35 |
| hsa-miR-150-5p               | 0.00  | 0.00  | 0.00  | 1.00 | 1.00 | -8.35 |
| hsa-miR-520d-5p+hsa-miR-527+ |       |       |       |      |      |       |
| hsa-miR-518a-5p              | 0.00  | 0.00  | 0.00  | 1.00 | 1.00 | -8.35 |
| hsa-miR-19b-3p               | -0.29 | 9.08  | -0.48 | 0.66 | 1.00 | -8.21 |
| hsa-miR-370-5p               | 0.00  | 0.00  | 0.00  | 1.00 | 1.00 | -8.35 |
| hsa-miR-3918                 | 0.00  | 0.00  | 0.00  | 1.00 | 1.00 | -8.35 |
| hsa-miR-548n                 | 0.00  | 0.00  | 0.00  | 1.00 | 1.00 | -8.35 |
| hsa-miR-1244                 | 0.00  | 0.00  | 0.00  | 1.00 | 1.00 | -8.35 |
| hsa-miR-320c                 | 0.00  | 0.00  | 0.00  | 1.00 | 1.00 | -8.35 |
| hsa-miR-345-5p               | -2.01 | 0.80  | -1.44 | 0.23 | 1.00 | -7.31 |
| hsa-miR-548d-5p              | -1.26 | 0.50  | -1.44 | 0.23 | 1.00 | -7.31 |
| hsa-miR-29b-3p               | -0.20 | 10.31 | -0.49 | 0.65 | 1.00 | -8.20 |
| hsa-miR-93-5p                | -0.44 | 12.58 | -1.56 | 0.20 | 1.00 | -7.17 |

|                               |       |      |       |      |      |       |
|-------------------------------|-------|------|-------|------|------|-------|
| hsa-miR-383-5p                | 0.00  | 0.00 | 0.00  | 1.00 | 1.00 | -8.35 |
| hsa-miR-516b-5p               | 0.00  | 0.00 | 0.00  | 1.00 | 1.00 | -8.35 |
| hsa-miR-613                   | 0.00  | 0.00 | 0.00  | 1.00 | 1.00 | -8.35 |
| hsa-miR-1248                  | 0.00  | 0.00 | 0.00  | 1.00 | 1.00 | -8.35 |
| hsa-miR-935                   | 0.00  | 0.00 | 0.00  | 1.00 | 1.00 | -8.35 |
| hsa-miR-548j-3p               | 0.00  | 0.00 | 0.00  | 1.00 | 1.00 | -8.35 |
| hsa-miR-3074-3p               | 0.00  | 0.00 | 0.00  | 1.00 | 1.00 | -8.35 |
| hsa-miR-450a-1-3p             | 0.00  | 0.00 | 0.00  | 1.00 | 1.00 | -8.35 |
| hsa-miR-568                   | 0.00  | 0.00 | 0.00  | 1.00 | 1.00 | -8.35 |
| hsa-miR-509-5p                | 0.00  | 0.00 | 0.00  | 1.00 | 1.00 | -8.35 |
| hsa-miR-525-3p                | 0.00  | 0.00 | 0.00  | 1.00 | 1.00 | -8.35 |
| hsa-miR-143-3p                | 0.00  | 0.00 | 0.00  | 1.00 | 1.00 | -8.35 |
| hsa-miR-151b                  | 0.00  | 0.00 | 0.00  | 1.00 | 1.00 | -8.35 |
| hsa-miR-326                   | 0.00  | 0.00 | 0.00  | 1.00 | 1.00 | -8.35 |
| hsa-miR-20a-5p+hsa-miR-20b-5p | -0.38 | 9.36 | -0.74 | 0.51 | 1.00 | -8.03 |
| hsa-miR-208b-5p               | 0.00  | 0.00 | 0.00  | 1.00 | 1.00 | -8.35 |
| hsa-miR-142-5p                | 0.00  | 0.00 | 0.00  | 1.00 | 1.00 | -8.35 |
| hsa-miR-367-3p                | 0.00  | 0.00 | 0.00  | 1.00 | 1.00 | -8.35 |
| hsa-miR-556-3p                | 0.00  | 0.00 | 0.00  | 1.00 | 1.00 | -8.35 |
| hsa-miR-320d                  | 0.00  | 0.00 | 0.00  | 1.00 | 1.00 | -8.35 |
| hsa-miR-384                   | 0.00  | 0.00 | 0.00  | 1.00 | 1.00 | -8.35 |
| hsa-miR-548a-3p               | 0.00  | 0.00 | 0.00  | 1.00 | 1.00 | -8.35 |
| hsa-miR-523-3p                | 0.00  | 0.00 | 0.00  | 1.00 | 1.00 | -8.35 |
| hsa-miR-491-3p                | 0.00  | 0.00 | 0.00  | 1.00 | 1.00 | -8.35 |
| hsa-miR-3195                  | 0.00  | 0.00 | 0.00  | 1.00 | 1.00 | -8.35 |
| hsa-miR-323b-3p               | 0.00  | 0.00 | 0.00  | 1.00 | 1.00 | -8.35 |
| hsa-miR-1285-3p               | 0.00  | 0.00 | 0.00  | 1.00 | 1.00 | -8.35 |
| hsa-miR-221-3p                | 2.36  | 1.41 | 1.14  | 0.33 | 1.00 | -7.65 |
| hsa-miR-376a-3p               | 0.00  | 0.00 | 0.00  | 1.00 | 1.00 | -8.35 |
| hsa-miR-526a+hsa-miR-518c-5p+ | 0.00  | 0.00 | 0.00  | 1.00 | 1.00 | -8.35 |

|                   |       |       |       |      |      |       |
|-------------------|-------|-------|-------|------|------|-------|
| hsa-miR-518d-5p   |       |       |       |      |      |       |
| hsa-let-7d-5p     | -0.52 | 12.32 | -1.38 | 0.25 | 1.00 | -7.37 |
| hsa-miR-196a-5p   | 0.54  | 6.43  | 0.57  | 0.60 | 1.00 | -8.15 |
| hsa-miR-1299      | 0.00  | 0.00  | 0.00  | 1.00 | 1.00 | -8.35 |
| hsa-miR-506-3p    | 0.00  | 0.00  | 0.00  | 1.00 | 1.00 | -8.35 |
| hsa-miR-491-5p    | 0.00  | 0.00  | 0.00  | 1.00 | 1.00 | -8.35 |
| hsa-miR-513b-5p   | 0.00  | 0.00  | 0.00  | 1.00 | 1.00 | -8.35 |
| hsa-miR-514a-5p   | 0.00  | 0.00  | 0.00  | 1.00 | 1.00 | -8.35 |
| hsa-miR-1183      | 0.00  | 0.00  | 0.00  | 1.00 | 1.00 | -8.35 |
| hsa-miR-1910-5p   | 0.00  | 0.00  | 0.00  | 1.00 | 1.00 | -8.35 |
| hsa-miR-451a      | 0.00  | 0.00  | 0.00  | 1.00 | 1.00 | -8.35 |
| hsa-miR-3180-5p   | 0.00  | 0.00  | 0.00  | 1.00 | 1.00 | -8.35 |
| hsa-miR-6503-3p   | 0.00  | 0.00  | 0.00  | 1.00 | 1.00 | -8.35 |
| hsa-miR-193b-3p   | -3.79 | 3.62  | -2.00 | 0.13 | 1.00 | -6.64 |
| hsa-miR-144-3p    | 0.00  | 0.00  | 0.00  | 1.00 | 1.00 | -8.35 |
| hsa-miR-4421      | 0.00  | 0.00  | 0.00  | 1.00 | 1.00 | -8.35 |
| hsa-miR-873-5p    | 0.00  | 0.00  | 0.00  | 1.00 | 1.00 | -8.35 |
| hsa-miR-942-3p    | 0.00  | 0.00  | 0.00  | 1.00 | 1.00 | -8.35 |
| hsa-miR-532-5p    | -2.34 | 0.94  | -1.44 | 0.23 | 1.00 | -7.31 |
| hsa-miR-320e      | 2.96  | 4.57  | 1.50  | 0.22 | 1.00 | -7.24 |
| hsa-miR-29c-3p    | -0.64 | 8.31  | -1.14 | 0.33 | 1.00 | -7.64 |
| hsa-miR-219a-2-3p | 0.00  | 0.00  | 0.00  | 1.00 | 1.00 | -8.35 |
| hsa-miR-875-3p    | 0.00  | 0.00  | 0.00  | 1.00 | 1.00 | -8.35 |
| hsa-miR-145-5p    | 0.00  | 0.00  | 0.00  | 1.00 | 1.00 | -8.35 |
| hsa-miR-1204      | 0.00  | 0.00  | 0.00  | 1.00 | 1.00 | -8.35 |
| hsa-miR-429       | -2.09 | 6.00  | -2.83 | 0.06 | 1.00 | -5.69 |
| hsa-miR-570-3p    | 0.00  | 0.00  | 0.00  | 1.00 | 1.00 | -8.35 |
| hsa-miR-578       | 0.00  | 0.00  | 0.00  | 1.00 | 1.00 | -8.35 |
| hsa-miR-490-5p    | 0.00  | 0.00  | 0.00  | 1.00 | 1.00 | -8.35 |
| hsa-miR-1245b-3p  | 0.00  | 0.00  | 0.00  | 1.00 | 1.00 | -8.35 |

|                                |       |      |       |      |      |       |
|--------------------------------|-------|------|-------|------|------|-------|
| hsa-miR-34c-5p                 | 0.00  | 0.00 | 0.00  | 1.00 | 1.00 | -8.35 |
| hsa-miR-381-5p                 | 0.00  | 0.00 | 0.00  | 1.00 | 1.00 | -8.35 |
| hsa-miR-550a-5p                | 0.00  | 0.00 | 0.00  | 1.00 | 1.00 | -8.35 |
| hsa-miR-1233-3p                | 0.00  | 0.00 | 0.00  | 1.00 | 1.00 | -8.35 |
| hsa-miR-518c-3p                | 0.00  | 0.00 | 0.00  | 1.00 | 1.00 | -8.35 |
| hsa-miR-4524a-5p               | 0.00  | 0.00 | 0.00  | 1.00 | 1.00 | -8.35 |
| hsa-miR-580-3p                 | 0.00  | 0.00 | 0.00  | 1.00 | 1.00 | -8.35 |
| hsa-miR-944                    | 0.00  | 0.00 | 0.00  | 1.00 | 1.00 | -8.35 |
| hsa-miR-152-5p                 | 0.00  | 0.00 | 0.00  | 1.00 | 1.00 | -8.35 |
| hsa-miR-219a-5p                | 0.00  | 0.00 | 0.00  | 1.00 | 1.00 | -8.35 |
| hsa-miR-153-3p                 | 0.00  | 0.00 | 0.00  | 1.00 | 1.00 | -8.35 |
| hsa-miR-124-3p                 | 0.00  | 0.00 | 0.00  | 1.00 | 1.00 | -8.35 |
| hsa-miR-5010-5p                | 0.00  | 0.00 | 0.00  | 1.00 | 1.00 | -8.35 |
| hsa-miR-545-3p                 | -1.57 | 0.63 | -1.44 | 0.23 | 1.00 | -7.31 |
| hsa-miR-654-3p                 | 0.00  | 0.00 | 0.00  | 1.00 | 1.00 | -8.35 |
| hsa-miR-1224-5p                | 0.00  | 0.00 | 0.00  | 1.00 | 1.00 | -8.35 |
| hsa-miR-3192-5p                | 0.00  | 0.00 | 0.00  | 1.00 | 1.00 | -8.35 |
| hsa-miR-425-5p                 | -0.89 | 7.51 | -2.47 | 0.08 | 1.00 | -6.10 |
| hsa-miR-561-3p                 | 0.00  | 0.00 | 0.00  | 1.00 | 1.00 | -8.35 |
| hsa-miR-553                    | 0.00  | 0.00 | 0.00  | 1.00 | 1.00 | -8.35 |
| hsa-miR-516a-5p                | 0.00  | 0.00 | 0.00  | 1.00 | 1.00 | -8.35 |
| hsa-miR-1271-3p                | 0.00  | 0.00 | 0.00  | 1.00 | 1.00 | -8.35 |
| hsa-miR-601                    | 0.00  | 0.00 | 0.00  | 1.00 | 1.00 | -8.35 |
| hsa-miR-1288-3p                | 0.00  | 0.00 | 0.00  | 1.00 | 1.00 | -8.35 |
| hsa-miR-133b                   | 0.00  | 0.00 | 0.00  | 1.00 | 1.00 | -8.35 |
| hsa-miR-504-3p                 | 0.00  | 0.00 | 0.00  | 1.00 | 1.00 | -8.35 |
| hsa-miR-4787-3p                | 0.00  | 0.00 | 0.00  | 1.00 | 1.00 | -8.35 |
| hsa-miR-708-5p                 | 0.00  | 0.00 | 0.00  | 1.00 | 1.00 | -8.35 |
| hsa-miR-329-3p                 | 0.00  | 0.00 | 0.00  | 1.00 | 1.00 | -8.35 |
| hsa-miR-548o-3p+hsa-miR-548ah- | 0.00  | 0.00 | 0.00  | 1.00 | 1.00 | -8.35 |

|                     |       |       |       |      |      |       |
|---------------------|-------|-------|-------|------|------|-------|
| 3p+hsa-miR-548av-3p |       |       |       |      |      |       |
| hsa-miR-431-5p      | 0.00  | 0.00  | 0.00  | 1.00 | 1.00 | -8.35 |
| hsa-miR-1-3p        | 0.00  | 0.00  | 0.00  | 1.00 | 1.00 | -8.35 |
| hsa-miR-887-3p      | 0.00  | 0.00  | 0.00  | 1.00 | 1.00 | -8.35 |
| hsa-miR-127-5p      | 0.00  | 0.00  | 0.00  | 1.00 | 1.00 | -8.35 |
| hsa-miR-3179        | 0.00  | 0.00  | 0.00  | 1.00 | 1.00 | -8.35 |
| hsa-miR-499a-5p     | 0.00  | 0.00  | 0.00  | 1.00 | 1.00 | -8.35 |
| hsa-miR-1908-5p     | 0.00  | 0.00  | 0.00  | 1.00 | 1.00 | -8.35 |
| hsa-miR-518d-3p     | 0.00  | 0.00  | 0.00  | 1.00 | 1.00 | -8.35 |
| hsa-miR-612         | -1.76 | 0.86  | -1.31 | 0.27 | 1.00 | -7.46 |
| hsa-miR-450b-5p     | -1.96 | 0.78  | -1.44 | 0.23 | 1.00 | -7.31 |
| hsa-miR-3614-3p     | 0.00  | 0.00  | 0.00  | 1.00 | 1.00 | -8.35 |
| hsa-miR-548l        | 0.00  | 0.00  | 0.00  | 1.00 | 1.00 | -8.35 |
| hsa-miR-1306-5p     | 0.00  | 0.00  | 0.00  | 1.00 | 1.00 | -8.35 |
| hsa-miR-3196        | 0.00  | 0.00  | 0.00  | 1.00 | 1.00 | -8.35 |
| hsa-miR-130b-3p     | -0.31 | 0.12  | -1.44 | 0.23 | 1.00 | -7.31 |
| hsa-miR-1910-3p     | 0.00  | 0.00  | 0.00  | 1.00 | 1.00 | -8.35 |
| hsa-miR-1247-5p     | 0.00  | 0.00  | 0.00  | 1.00 | 1.00 | -8.35 |
| hsa-miR-151a-5p     | 0.67  | 5.25  | 0.42  | 0.70 | 1.00 | -8.25 |
| hsa-miR-3140-3p     | 0.00  | 0.00  | 0.00  | 1.00 | 1.00 | -8.35 |
| hsa-miR-211-5p      | 0.00  | 0.00  | 0.00  | 1.00 | 1.00 | -8.35 |
| hsa-miR-23b-3p      | 0.86  | 10.58 | 1.32  | 0.27 | 1.00 | -7.44 |
| hsa-miR-526b-5p     | 0.00  | 0.00  | 0.00  | 1.00 | 1.00 | -8.35 |
| hsa-miR-337-5p      | 0.00  | 0.00  | 0.00  | 1.00 | 1.00 | -8.35 |
| hsa-miR-369-3p      | 0.00  | 0.00  | 0.00  | 1.00 | 1.00 | -8.35 |
| hsa-miR-28-3p       | 0.61  | 2.42  | 0.27  | 0.80 | 1.00 | -8.31 |
| hsa-miR-585-3p      | 0.00  | 0.00  | 0.00  | 1.00 | 1.00 | -8.35 |
| hsa-miR-185-5p      | -0.62 | 5.76  | -1.11 | 0.34 | 1.00 | -7.67 |
| hsa-miR-497-5p      | -2.62 | 6.15  | -2.47 | 0.08 | 1.00 | -6.09 |
| hsa-miR-1323        | 0.00  | 0.00  | 0.00  | 1.00 | 1.00 | -8.35 |

|                   |       |      |       |      |      |       |
|-------------------|-------|------|-------|------|------|-------|
| hsa-miR-1262      | 0.00  | 0.00 | 0.00  | 1.00 | 1.00 | -8.35 |
| hsa-miR-512-5p    | 0.00  | 0.00 | 0.00  | 1.00 | 1.00 | -8.35 |
| hsa-miR-4536-3p   | 0.00  | 0.00 | 0.00  | 1.00 | 1.00 | -8.35 |
| hsa-miR-33b-5p    | 0.00  | 0.00 | 0.00  | 1.00 | 1.00 | -8.35 |
| hsa-miR-548a-5p   | 0.00  | 0.00 | 0.00  | 1.00 | 1.00 | -8.35 |
| hsa-miR-582-5p    | -2.28 | 0.91 | -1.44 | 0.23 | 1.00 | -7.31 |
| hsa-miR-508-5p    | 0.00  | 0.00 | 0.00  | 1.00 | 1.00 | -8.35 |
| hsa-miR-626       | 0.00  | 0.00 | 0.00  | 1.00 | 1.00 | -8.35 |
| hsa-miR-30e-3p    | -2.40 | 0.96 | -1.44 | 0.23 | 1.00 | -7.31 |
| hsa-miR-132-3p    | 0.72  | 6.04 | 0.88  | 0.44 | 1.00 | -7.91 |
| hsa-miR-203a-5p   | 0.00  | 0.00 | 0.00  | 1.00 | 1.00 | -8.35 |
| hsa-miR-6503-5p   | 0.00  | 0.00 | 0.00  | 1.00 | 1.00 | -8.35 |
| hsa-miR-1278      | 0.00  | 0.00 | 0.00  | 1.00 | 1.00 | -8.35 |
| hsa-miR-922       | 0.00  | 0.00 | 0.00  | 1.00 | 1.00 | -8.35 |
| hsa-miR-338-5p    | 0.00  | 0.00 | 0.00  | 1.00 | 1.00 | -8.35 |
| hsa-miR-23c       | 0.00  | 0.00 | 0.00  | 1.00 | 1.00 | -8.35 |
| hsa-miR-4284      | 0.00  | 0.00 | 0.00  | 1.00 | 1.00 | -8.35 |
| hsa-miR-769-3p    | 0.00  | 0.00 | 0.00  | 1.00 | 1.00 | -8.35 |
| hsa-miR-369-5p    | 0.00  | 0.00 | 0.00  | 1.00 | 1.00 | -8.35 |
| hsa-miR-18a-5p    | -1.01 | 6.07 | -1.08 | 0.35 | 1.00 | -7.71 |
| hsa-miR-126-3p    | 0.37  | 9.11 | 0.69  | 0.54 | 1.00 | -8.07 |
| hsa-miR-1185-2-3p | 0.00  | 0.00 | 0.00  | 1.00 | 1.00 | -8.35 |
| hsa-miR-548k      | 0.00  | 0.00 | 0.00  | 1.00 | 1.00 | -8.35 |
| hsa-miR-3065-3p   | 0.00  | 0.00 | 0.00  | 1.00 | 1.00 | -8.35 |
| hsa-miR-548g-3p   | 0.00  | 0.00 | 0.00  | 1.00 | 1.00 | -8.35 |
| hsa-miR-448       | 0.00  | 0.00 | 0.00  | 1.00 | 1.00 | -8.35 |
| hsa-miR-3605-5p   | 0.00  | 0.00 | 0.00  | 1.00 | 1.00 | -8.35 |
| hsa-miR-510-3p    | 0.00  | 0.00 | 0.00  | 1.00 | 1.00 | -8.35 |
| hsa-miR-598-3p    | -0.08 | 6.54 | -0.16 | 0.88 | 1.00 | -8.34 |
| hsa-miR-876-5p    | 0.00  | 0.00 | 0.00  | 1.00 | 1.00 | -8.35 |

|                                 |       |       |       |      |      |       |
|---------------------------------|-------|-------|-------|------|------|-------|
| hsa-miR-650                     | 0.00  | 0.00  | 0.00  | 1.00 | 1.00 | -8.35 |
| hsa-miR-181d-3p                 | 0.00  | 0.00  | 0.00  | 1.00 | 1.00 | -8.35 |
| hsa-miR-574-3p                  | -2.57 | 2.79  | -1.16 | 0.32 | 1.00 | -7.63 |
| hsa-miR-652-5p                  | 0.00  | 0.00  | 0.00  | 1.00 | 1.00 | -8.35 |
| hsa-miR-563                     | 0.00  | 0.00  | 0.00  | 1.00 | 1.00 | -8.35 |
| hsa-miR-517c-3p+hsa-miR-519a-3p | 0.00  | 0.00  | 0.00  | 1.00 | 1.00 | -8.35 |
| hsa-miR-660-3p                  | 0.00  | 0.00  | 0.00  | 1.00 | 1.00 | -8.35 |
| hsa-miR-5010-3p                 | 0.00  | 0.00  | 0.00  | 1.00 | 1.00 | -8.35 |
| hsa-miR-1302                    | 0.00  | 0.00  | 0.00  | 1.00 | 1.00 | -8.35 |
| hsa-miR-642a-5p                 | 0.00  | 0.00  | 0.00  | 1.00 | 1.00 | -8.35 |
| hsa-miR-502-5p                  | 0.00  | 0.00  | 0.00  | 1.00 | 1.00 | -8.35 |
| hsa-miR-4647                    | 0.00  | 0.00  | 0.00  | 1.00 | 1.00 | -8.35 |
| hsa-miR-184                     | 0.00  | 0.00  | 0.00  | 1.00 | 1.00 | -8.35 |
| hsa-miR-200a-3p                 | -0.94 | 10.62 | -2.55 | 0.07 | 1.00 | -6.00 |
| hsa-miR-301a-3p                 | -0.51 | 11.02 | -1.11 | 0.34 | 1.00 | -7.68 |
| hsa-miR-4488                    | 2.60  | 1.56  | 1.66  | 0.18 | 1.00 | -7.05 |
| hsa-miR-522-3p                  | 0.00  | 0.00  | 0.00  | 1.00 | 1.00 | -8.35 |
| hsa-miR-487b-5p                 | 0.00  | 0.00  | 0.00  | 1.00 | 1.00 | -8.35 |
| hsa-miR-5001-5p                 | 0.00  | 0.00  | 0.00  | 1.00 | 1.00 | -8.35 |
| hsa-miR-802                     | 0.00  | 0.00  | 0.00  | 1.00 | 1.00 | -8.35 |
| hsa-miR-378i                    | 0.66  | 7.23  | 0.89  | 0.43 | 1.00 | -7.89 |
| hsa-miR-4286                    | -1.26 | 0.50  | -1.44 | 0.23 | 1.00 | -7.31 |
| hsa-miR-532-3p                  | 0.00  | 0.00  | 0.00  | 1.00 | 1.00 | -8.35 |
| hsa-miR-933                     | 0.00  | 0.00  | 0.00  | 1.00 | 1.00 | -8.35 |
| hsa-miR-362-5p                  | -2.43 | 1.43  | -1.17 | 0.32 | 1.00 | -7.61 |
| hsa-miR-4516                    | 0.00  | 0.00  | 0.00  | 1.00 | 1.00 | -8.35 |
| hsa-miR-421                     | -0.99 | 5.91  | -0.54 | 0.62 | 1.00 | -8.17 |
| hsa-miR-551b-3p                 | 0.00  | 0.00  | 0.00  | 1.00 | 1.00 | -8.35 |
| hsa-miR-378f                    | 0.00  | 0.00  | 0.00  | 1.00 | 1.00 | -8.35 |
| hsa-miR-543                     | 0.00  | 0.00  | 0.00  | 1.00 | 1.00 | -8.35 |



|                 |       |      |       |      |      |       |
|-----------------|-------|------|-------|------|------|-------|
| hsa-miR-30a-3p  | 0.00  | 0.00 | 0.00  | 1.00 | 1.00 | -8.35 |
| hsa-miR-324-3p  | 0.00  | 0.00 | 0.00  | 1.00 | 1.00 | -8.35 |
| hsa-miR-1305    | 0.00  | 0.00 | 0.00  | 1.00 | 1.00 | -8.35 |
| hsa-miR-584-3p  | 0.00  | 0.00 | 0.00  | 1.00 | 1.00 | -8.35 |
| hsa-miR-3147    | 0.00  | 0.00 | 0.00  | 1.00 | 1.00 | -8.35 |
| hsa-miR-548e-5p | 0.00  | 0.00 | 0.00  | 1.00 | 1.00 | -8.35 |
| hsa-miR-607     | 0.00  | 0.00 | 0.00  | 1.00 | 1.00 | -8.35 |
| hsa-miR-1197    | 0.00  | 0.00 | 0.00  | 1.00 | 1.00 | -8.35 |
| hsa-miR-1285-5p | 0.00  | 0.00 | 0.00  | 1.00 | 1.00 | -8.35 |
| hsa-miR-764     | 0.00  | 0.00 | 0.00  | 1.00 | 1.00 | -8.35 |
| hsa-miR-525-5p  | 0.00  | 0.00 | 0.00  | 1.00 | 1.00 | -8.35 |
| hsa-miR-1296-3p | 0.00  | 0.00 | 0.00  | 1.00 | 1.00 | -8.35 |
| hsa-miR-4461    | 0.00  | 0.00 | 0.00  | 1.00 | 1.00 | -8.35 |
| hsa-miR-183-5p  | -1.10 | 8.88 | -2.47 | 0.08 | 1.00 | -6.09 |
| hsa-miR-615-3p  | 0.00  | 0.00 | 0.00  | 1.00 | 1.00 | -8.35 |
| hsa-miR-208b-3p | 0.00  | 0.00 | 0.00  | 1.00 | 1.00 | -8.35 |
| hsa-miR-299-5p  | 0.00  | 0.00 | 0.00  | 1.00 | 1.00 | -8.35 |
| hsa-miR-1290    | -1.73 | 0.69 | -1.44 | 0.23 | 1.00 | -7.31 |
| hsa-miR-107     | -0.22 | 9.89 | -0.52 | 0.63 | 1.00 | -8.19 |
| hsa-miR-449b-5p | 0.00  | 0.00 | 0.00  | 1.00 | 1.00 | -8.35 |
| hsa-miR-4707-5p | 0.00  | 0.00 | 0.00  | 1.00 | 1.00 | -8.35 |
| hsa-miR-548y    | 0.00  | 0.00 | 0.00  | 1.00 | 1.00 | -8.35 |
| hsa-miR-370-3p  | 0.00  | 0.00 | 0.00  | 1.00 | 1.00 | -8.35 |
| hsa-miR-34a-5p  | 0.12  | 9.69 | 0.43  | 0.69 | 1.00 | -8.24 |
| hsa-miR-519c-3p | 0.00  | 0.00 | 0.00  | 1.00 | 1.00 | -8.35 |
| hsa-miR-134-3p  | 0.00  | 0.00 | 0.00  | 1.00 | 1.00 | -8.35 |
| hsa-miR-2110    | 0.00  | 0.00 | 0.00  | 1.00 | 1.00 | -8.35 |
| hsa-miR-301a-5p | -2.14 | 0.85 | -1.44 | 0.23 | 1.00 | -7.31 |
| hsa-miR-1973    | 0.00  | 0.00 | 0.00  | 1.00 | 1.00 | -8.35 |
| hsa-miR-643     | 0.00  | 0.00 | 0.00  | 1.00 | 1.00 | -8.35 |

|                   |       |       |       |      |      |       |
|-------------------|-------|-------|-------|------|------|-------|
| hsa-miR-328-5p    | 0.00  | 0.00  | 0.00  | 1.00 | 1.00 | -8.35 |
| hsa-miR-450a-2-3p | 0.00  | 0.00  | 0.00  | 1.00 | 1.00 | -8.35 |
| hsa-miR-1272      | 0.00  | 0.00  | 0.00  | 1.00 | 1.00 | -8.35 |
| hsa-miR-199b-5p   | -0.69 | 0.27  | -1.44 | 0.23 | 1.00 | -7.31 |
| hsa-miR-210-3p    | -1.73 | 0.69  | -1.44 | 0.23 | 1.00 | -7.31 |
| hsa-let-7g-5p     | -1.10 | 10.39 | -3.20 | 0.04 | 1.00 | -5.29 |
| hsa-miR-26a-5p    | 0.17  | 8.95  | 0.35  | 0.75 | 1.00 | -8.28 |
| hsa-miR-937-3p    | 0.00  | 0.00  | 0.00  | 1.00 | 1.00 | -8.35 |
| hsa-miR-300       | 0.00  | 0.00  | 0.00  | 1.00 | 1.00 | -8.35 |
| hsa-miR-25-5p     | 0.00  | 0.00  | 0.00  | 1.00 | 1.00 | -8.35 |
| hsa-miR-888-5p    | 0.00  | 0.00  | 0.00  | 1.00 | 1.00 | -8.35 |
| hsa-miR-627-5p    | 0.00  | 0.00  | 0.00  | 1.00 | 1.00 | -8.35 |
| hsa-miR-186-5p    | -2.31 | 0.92  | -1.44 | 0.23 | 1.00 | -7.31 |
| hsa-miR-10b-5p    | 0.00  | 0.00  | 0.00  | 1.00 | 1.00 | -8.35 |
| hsa-miR-542-3p    | 0.00  | 0.00  | 0.00  | 1.00 | 1.00 | -8.35 |
| hsa-miR-887-5p    | 0.00  | 0.00  | 0.00  | 1.00 | 1.00 | -8.35 |
| hsa-miR-197-5p    | 0.00  | 0.00  | 0.00  | 1.00 | 1.00 | -8.35 |
| hsa-miR-939-5p    | 0.00  | 0.00  | 0.00  | 1.00 | 1.00 | -8.35 |
| hsa-miR-378g      | 0.84  | 3.23  | 0.29  | 0.79 | 1.00 | -8.30 |
| hsa-miR-95-3p     | -1.34 | 6.12  | -2.32 | 0.09 | 1.00 | -6.27 |
| hsa-miR-412-3p    | 0.00  | 0.00  | 0.00  | 1.00 | 1.00 | -8.35 |
| hsa-miR-1228-3p   | 0.00  | 0.00  | 0.00  | 1.00 | 1.00 | -8.35 |
| hsa-miR-301b-3p   | 0.00  | 0.00  | 0.00  | 1.00 | 1.00 | -8.35 |
| hsa-miR-27a-3p    | 0.00  | 0.00  | 0.00  | 1.00 | 1.00 | -8.35 |
| hsa-miR-1268b     | 0.00  | 0.00  | 0.00  | 1.00 | 1.00 | -8.35 |
| hsa-miR-514a-3p   | 0.00  | 0.00  | 0.00  | 1.00 | 1.00 | -8.35 |
| hsa-miR-548ar-3p  | 0.00  | 0.00  | 0.00  | 1.00 | 1.00 | -8.35 |
| hsa-miR-1255a     | 0.00  | 0.00  | 0.00  | 1.00 | 1.00 | -8.35 |
| hsa-miR-627-3p    | 0.00  | 0.00  | 0.00  | 1.00 | 1.00 | -8.35 |
| hsa-miR-1295a     | 0.00  | 0.00  | 0.00  | 1.00 | 1.00 | -8.35 |

|                                 |       |       |       |      |      |       |
|---------------------------------|-------|-------|-------|------|------|-------|
| hsa-miR-597-5p                  | 0.00  | 0.00  | 0.00  | 1.00 | 1.00 | -8.35 |
| hsa-miR-576-3p                  | 0.00  | 0.00  | 0.00  | 1.00 | 1.00 | -8.35 |
| hsa-miR-891a-5p                 | 0.00  | 0.00  | 0.00  | 1.00 | 1.00 | -8.35 |
| hsa-miR-133a-5p                 | 0.00  | 0.00  | 0.00  | 1.00 | 1.00 | -8.35 |
| hsa-miR-301b-5p                 | 0.00  | 0.00  | 0.00  | 1.00 | 1.00 | -8.35 |
| hsa-miR-210-5p                  | 0.00  | 0.00  | 0.00  | 1.00 | 1.00 | -8.35 |
| hsa-miR-181a-2-3p               | 0.00  | 0.00  | 0.00  | 1.00 | 1.00 | -8.35 |
| hsa-miR-942-5p                  | -0.31 | 0.12  | -1.44 | 0.23 | 1.00 | -7.31 |
| hsa-miR-133a-3p                 | 0.00  | 0.00  | 0.00  | 1.00 | 1.00 | -8.35 |
| hsa-miR-23a-3p                  | -0.53 | 12.33 | -1.12 | 0.33 | 1.00 | -7.66 |
| hsa-miR-548m                    | 0.00  | 0.00  | 0.00  | 1.00 | 1.00 | -8.35 |
| hsa-miR-208a-3p                 | 0.00  | 0.00  | 0.00  | 1.00 | 1.00 | -8.35 |
| hsa-miR-30e-5p                  | -1.01 | 6.70  | -1.93 | 0.14 | 1.00 | -6.73 |
| hsa-miR-378d                    | 0.00  | 0.00  | 0.00  | 1.00 | 1.00 | -8.35 |
| hsa-miR-335-5p                  | -2.14 | 0.85  | -1.44 | 0.23 | 1.00 | -7.31 |
| hsa-miR-514b-5p                 | 0.00  | 0.00  | 0.00  | 1.00 | 1.00 | -8.35 |
| hsa-miR-199a-3p+hsa-miR-199b-3p | -2.05 | 0.82  | -1.44 | 0.23 | 1.00 | -7.31 |
| hsa-miR-378e                    | 0.00  | 0.00  | 0.00  | 1.00 | 1.00 | -8.35 |
| hsa-miR-4485-3p                 | 0.00  | 0.00  | 0.00  | 1.00 | 1.00 | -8.35 |
| hsa-miR-1537-3p                 | 0.00  | 0.00  | 0.00  | 1.00 | 1.00 | -8.35 |
| hsa-miR-548v                    | 0.00  | 0.00  | 0.00  | 1.00 | 1.00 | -8.35 |
| hsa-miR-487a-3p                 | 0.00  | 0.00  | 0.00  | 1.00 | 1.00 | -8.35 |
| hsa-miR-3613-3p                 | 0.00  | 0.00  | 0.00  | 1.00 | 1.00 | -8.35 |
| hsa-miR-1245a                   | 0.00  | 0.00  | 0.00  | 1.00 | 1.00 | -8.35 |
| hsa-miR-498                     | 0.00  | 0.00  | 0.00  | 1.00 | 1.00 | -8.35 |
| hsa-miR-495-5p                  | 0.00  | 0.00  | 0.00  | 1.00 | 1.00 | -8.35 |
| hsa-miR-3614-5p                 | 0.00  | 0.00  | 0.00  | 1.00 | 1.00 | -8.35 |
| hsa-miR-137                     | 0.00  | 0.00  | 0.00  | 1.00 | 1.00 | -8.35 |
| hsa-miR-187-3p                  | 0.85  | 0.51  | 0.83  | 0.46 | 1.00 | -7.95 |
| hsa-miR-1249-3p                 | 0.00  | 0.00  | 0.00  | 1.00 | 1.00 | -8.35 |

|                 |       |       |       |      |      |       |
|-----------------|-------|-------|-------|------|------|-------|
| hsa-miR-3168    | 0.00  | 0.00  | 0.00  | 1.00 | 1.00 | -8.35 |
| hsa-miR-664a-3p | -1.10 | 2.02  | -0.41 | 0.70 | 1.00 | -8.25 |
| hsa-miR-639     | 0.00  | 0.00  | 0.00  | 1.00 | 1.00 | -8.35 |
| hsa-miR-337-3p  | 0.00  | 0.00  | 0.00  | 1.00 | 1.00 | -8.35 |
| hsa-miR-363-3p  | 0.81  | 5.76  | 1.24  | 0.29 | 1.00 | -7.54 |
| hsa-miR-1185-5p | 0.00  | 0.00  | 0.00  | 1.00 | 1.00 | -8.35 |
| hsa-miR-767-5p  | 0.00  | 0.00  | 0.00  | 1.00 | 1.00 | -8.35 |
| hsa-miR-1283    | 0.00  | 0.00  | 0.00  | 1.00 | 1.00 | -8.35 |
| hsa-miR-199a-5p | 0.00  | 0.00  | 0.00  | 1.00 | 1.00 | -8.35 |
| hsa-miR-16-5p   | -0.99 | 12.15 | -2.53 | 0.07 | 1.00 | -6.03 |
| hsa-miR-299-3p  | 0.00  | 0.00  | 0.00  | 1.00 | 1.00 | -8.35 |
| hsa-miR-1976    | 0.00  | 0.00  | 0.00  | 1.00 | 1.00 | -8.35 |
| hsa-miR-454-3p  | -1.07 | 9.27  | -2.87 | 0.05 | 1.00 | -5.64 |
| hsa-miR-345-3p  | 0.00  | 0.00  | 0.00  | 1.00 | 1.00 | -8.35 |
| hsa-miR-556-5p  | 0.00  | 0.00  | 0.00  | 1.00 | 1.00 | -8.35 |
| hsa-miR-487b-3p | 0.00  | 0.00  | 0.00  | 1.00 | 1.00 | -8.35 |
| hsa-miR-513a-3p | 0.00  | 0.00  | 0.00  | 1.00 | 1.00 | -8.35 |
| hsa-miR-885-5p  | 0.00  | 0.00  | 0.00  | 1.00 | 1.00 | -8.35 |
| hsa-miR-521     | 0.00  | 0.00  | 0.00  | 1.00 | 1.00 | -8.35 |
| hsa-miR-147b    | 0.00  | 0.00  | 0.00  | 1.00 | 1.00 | -8.35 |
| hsa-miR-2113    | 0.00  | 0.00  | 0.00  | 1.00 | 1.00 | -8.35 |
| hsa-miR-200b-3p | -0.62 | 12.66 | -1.47 | 0.23 | 1.00 | -7.27 |
| hsa-miR-18b-5p  | 0.00  | 0.00  | 0.00  | 1.00 | 1.00 | -8.35 |
| hsa-miR-188-3p  | 0.00  | 0.00  | 0.00  | 1.00 | 1.00 | -8.35 |
| hsa-miR-6720-3p | 0.00  | 0.00  | 0.00  | 1.00 | 1.00 | -8.35 |
| hsa-miR-582-3p  | 0.00  | 0.00  | 0.00  | 1.00 | 1.00 | -8.35 |
| hsa-miR-1200    | 0.00  | 0.00  | 0.00  | 1.00 | 1.00 | -8.35 |
| hsa-miR-378h    | 0.00  | 0.00  | 0.00  | 1.00 | 1.00 | -8.35 |
| hsa-miR-4792    | 0.00  | 0.00  | 0.00  | 1.00 | 1.00 | -8.35 |
| hsa-miR-572     | 0.00  | 0.00  | 0.00  | 1.00 | 1.00 | -8.35 |

|                 |       |       |       |      |      |       |
|-----------------|-------|-------|-------|------|------|-------|
| hsa-miR-660-5p  | -3.82 | 4.48  | -1.99 | 0.13 | 1.00 | -6.66 |
| hsa-miR-449a    | 0.00  | 0.00  | 0.00  | 1.00 | 1.00 | -8.35 |
| hsa-miR-302a-3p | 0.00  | 0.00  | 0.00  | 1.00 | 1.00 | -8.35 |
| hsa-miR-27b-3p  | 1.04  | 10.32 | 2.31  | 0.09 | 1.00 | -6.27 |
| hsa-miR-1281    | 0.00  | 0.00  | 0.00  | 1.00 | 1.00 | -8.35 |
| hsa-miR-106b-5p | -1.00 | 9.88  | -2.20 | 0.10 | 1.00 | -6.41 |
| hsa-miR-182-3p  | 0.00  | 0.00  | 0.00  | 1.00 | 1.00 | -8.35 |
| hsa-miR-455-3p  | 0.00  | 0.00  | 0.00  | 1.00 | 1.00 | -8.35 |
| hsa-miR-128-3p  | 0.00  | 0.00  | 0.00  | 1.00 | 1.00 | -8.35 |
| hsa-miR-376c-5p | 0.00  | 0.00  | 0.00  | 1.00 | 1.00 | -8.35 |
| hsa-miR-1275    | 0.00  | 0.00  | 0.00  | 1.00 | 1.00 | -8.35 |
| hsa-miR-1224-3p | 0.00  | 0.00  | 0.00  | 1.00 | 1.00 | -8.35 |
| hsa-miR-518e-3p | 0.00  | 0.00  | 0.00  | 1.00 | 1.00 | -8.35 |
| hsa-miR-625-5p  | 0.15  | 4.22  | 0.08  | 0.94 | 1.00 | -8.35 |
| hsa-miR-302a-5p | 0.00  | 0.00  | 0.00  | 1.00 | 1.00 | -8.35 |
| hsa-miR-130a-3p | 0.00  | 0.00  | 0.00  | 1.00 | 1.00 | -8.35 |
| hsa-miR-136-5p  | 0.00  | 0.00  | 0.00  | 1.00 | 1.00 | -8.35 |
| hsa-miR-758-5p  | 0.00  | 0.00  | 0.00  | 1.00 | 1.00 | -8.35 |
| hsa-miR-1277-3p | 0.00  | 0.00  | 0.00  | 1.00 | 1.00 | -8.35 |
| hsa-miR-4425    | 0.00  | 0.00  | 0.00  | 1.00 | 1.00 | -8.35 |
| hsa-miR-511-5p  | 0.00  | 0.00  | 0.00  | 1.00 | 1.00 | -8.35 |
| hsa-miR-154-5p  | 0.00  | 0.00  | 0.00  | 1.00 | 1.00 | -8.35 |
| hsa-miR-934     | 0.00  | 0.00  | 0.00  | 1.00 | 1.00 | -8.35 |
| hsa-miR-330-3p  | 0.00  | 0.00  | 0.00  | 1.00 | 1.00 | -8.35 |
| hsa-miR-222-3p  | 4.25  | 4.56  | 2.49  | 0.08 | 1.00 | -6.07 |
| hsa-miR-4741    | 0.00  | 0.00  | 0.00  | 1.00 | 1.00 | -8.35 |
| hsa-miR-513c-3p | 0.00  | 0.00  | 0.00  | 1.00 | 1.00 | -8.35 |
| hsa-miR-330-5p  | 0.00  | 0.00  | 0.00  | 1.00 | 1.00 | -8.35 |
| hsa-miR-760     | 0.00  | 0.00  | 0.00  | 1.00 | 1.00 | -8.35 |
| hsa-miR-25-3p   | -0.65 | 12.58 | -1.33 | 0.26 | 1.00 | -7.43 |

|                                                  |       |       |       |      |      |       |
|--------------------------------------------------|-------|-------|-------|------|------|-------|
| hsa-miR-410-3p                                   | 0.00  | 0.00  | 0.00  | 1.00 | 1.00 | -8.35 |
| hsa-miR-376b-3p                                  | 0.00  | 0.00  | 0.00  | 1.00 | 1.00 | -8.35 |
| hsa-miR-484                                      | -0.93 | 0.37  | -1.44 | 0.23 | 1.00 | -7.31 |
| hsa-miR-539-3p                                   | 0.00  | 0.00  | 0.00  | 1.00 | 1.00 | -8.35 |
| hsa-miR-548c-5p+hsa-miR-548o-5p+hsa-miR-548am-5p | 0.00  | 0.00  | 0.00  | 1.00 | 1.00 | -8.35 |
| hsa-miR-649                                      | 0.00  | 0.00  | 0.00  | 1.00 | 1.00 | -8.35 |
| hsa-miR-631                                      | 0.00  | 0.00  | 0.00  | 1.00 | 1.00 | -8.35 |
| hsa-miR-3185                                     | 0.00  | 0.00  | 0.00  | 1.00 | 1.00 | -8.35 |
| hsa-miR-1909-3p                                  | 0.00  | 0.00  | 0.00  | 1.00 | 1.00 | -8.35 |
| hsa-miR-1249-5p                                  | 0.00  | 0.00  | 0.00  | 1.00 | 1.00 | -8.35 |
| hsa-miR-129-5p                                   | 0.00  | 0.00  | 0.00  | 1.00 | 1.00 | -8.35 |
| hsa-miR-3615                                     | 0.00  | 0.00  | 0.00  | 1.00 | 1.00 | -8.35 |
| hsa-miR-1254                                     | 0.00  | 0.00  | 0.00  | 1.00 | 1.00 | -8.35 |
| hsa-miR-296-3p                                   | 0.00  | 0.00  | 0.00  | 1.00 | 1.00 | -8.35 |
| hsa-miR-323a-3p                                  | 0.00  | 0.00  | 0.00  | 1.00 | 1.00 | -8.35 |
| hsa-miR-876-3p                                   | 0.00  | 0.00  | 0.00  | 1.00 | 1.00 | -8.35 |
| hsa-miR-769-5p                                   | -0.51 | 6.10  | -0.89 | 0.43 | 1.00 | -7.90 |
| hsa-miR-146a-5p                                  | 0.00  | 0.00  | 0.00  | 1.00 | 1.00 | -8.35 |
| hsa-let-7e-5p                                    | 0.39  | 10.55 | 1.39  | 0.25 | 1.00 | -7.36 |
| hsa-miR-376c-3p                                  | 0.00  | 0.00  | 0.00  | 1.00 | 1.00 | -8.35 |
| hsa-miR-361-3p                                   | -2.20 | 2.64  | -0.86 | 0.45 | 1.00 | -7.93 |
| hsa-miR-99a-5p                                   | 1.08  | 8.10  | 1.83  | 0.15 | 1.00 | -6.84 |
| hsa-miR-485-3p                                   | 0.00  | 0.00  | 0.00  | 1.00 | 1.00 | -8.35 |
| hsa-miR-1322                                     | 0.00  | 0.00  | 0.00  | 1.00 | 1.00 | -8.35 |
| hsa-miR-1260b                                    | 0.00  | 0.00  | 0.00  | 1.00 | 1.00 | -8.35 |
| hsa-miR-507                                      | 0.00  | 0.00  | 0.00  | 1.00 | 1.00 | -8.35 |
| hsa-miR-642a-3p                                  | 0.00  | 0.00  | 0.00  | 1.00 | 1.00 | -8.35 |
| hsa-miR-378b                                     | 0.00  | 0.00  | 0.00  | 1.00 | 1.00 | -8.35 |
| hsa-miR-331-5p                                   | 0.00  | 0.00  | 0.00  | 1.00 | 1.00 | -8.35 |

|                               |       |      |       |      |      |       |
|-------------------------------|-------|------|-------|------|------|-------|
| hsa-miR-3613-5p               | 0.00  | 0.00 | 0.00  | 1.00 | 1.00 | -8.35 |
| hsa-miR-2116-5p               | 0.00  | 0.00 | 0.00  | 1.00 | 1.00 | -8.35 |
| hsa-miR-204-5p                | 0.00  | 0.00 | 0.00  | 1.00 | 1.00 | -8.35 |
| hsa-miR-22-3p                 | -0.03 | 8.03 | -0.07 | 0.94 | 1.00 | -8.35 |
| hsa-miR-323a-5p               | 0.00  | 0.00 | 0.00  | 1.00 | 1.00 | -8.35 |
| hsa-miR-6511a-3p              | 0.00  | 0.00 | 0.00  | 1.00 | 1.00 | -8.35 |
| hsa-miR-554                   | 0.00  | 0.00 | 0.00  | 1.00 | 1.00 | -8.35 |
| hsa-miR-600                   | 0.00  | 0.00 | 0.00  | 1.00 | 1.00 | -8.35 |
| hsa-miR-1303                  | 0.00  | 0.00 | 0.00  | 1.00 | 1.00 | -8.35 |
| hsa-miR-517b-3p               | 0.00  | 0.00 | 0.00  | 1.00 | 1.00 | -8.35 |
| hsa-miR-106a-5p+hsa-miR-17-5p | -0.08 | 7.60 | -0.11 | 0.92 | 1.00 | -8.35 |
| hsa-miR-496                   | 0.00  | 0.00 | 0.00  | 1.00 | 1.00 | -8.35 |
| hsa-miR-3190-3p               | 0.00  | 0.00 | 0.00  | 1.00 | 1.00 | -8.35 |
| hsa-miR-148b-3p               | -0.91 | 9.28 | -2.05 | 0.12 | 1.00 | -6.58 |
| hsa-miR-223-3p                | 0.00  | 0.00 | 0.00  | 1.00 | 1.00 | -8.35 |
| hsa-miR-196b-5p               | -2.42 | 0.97 | -1.44 | 0.23 | 1.00 | -7.31 |
| hsa-miR-652-3p                | -4.11 | 3.16 | -2.21 | 0.10 | 1.00 | -6.40 |
| hsa-miR-637                   | 0.00  | 0.00 | 0.00  | 1.00 | 1.00 | -8.35 |
| hsa-miR-5001-3p               | 0.00  | 0.00 | 0.00  | 1.00 | 1.00 | -8.35 |
| hsa-miR-3130-3p               | 0.00  | 0.00 | 0.00  | 1.00 | 1.00 | -8.35 |
| hsa-miR-630                   | 0.00  | 0.00 | 0.00  | 1.00 | 1.00 | -8.35 |
| hsa-miR-197-3p                | -2.47 | 2.04 | -1.93 | 0.14 | 1.00 | -6.72 |
| hsa-miR-1245b-5p              | 0.00  | 0.00 | 0.00  | 1.00 | 1.00 | -8.35 |
| hsa-miR-648                   | 0.00  | 0.00 | 0.00  | 1.00 | 1.00 | -8.35 |
| hsa-miR-552-3p                | 0.00  | 0.00 | 0.00  | 1.00 | 1.00 | -8.35 |
| hsa-miR-346                   | 0.00  | 0.00 | 0.00  | 1.00 | 1.00 | -8.35 |
| hsa-miR-377-3p                | 0.00  | 0.00 | 0.00  | 1.00 | 1.00 | -8.35 |
| hsa-miR-219b-3p               | 0.00  | 0.00 | 0.00  | 1.00 | 1.00 | -8.35 |
| hsa-miR-744-5p                | 0.00  | 0.00 | 0.00  | 1.00 | 1.00 | -8.35 |
| hsa-miR-224-5p                | 0.00  | 0.00 | 0.00  | 1.00 | 1.00 | -8.35 |

|                              |       |      |       |      |      |       |
|------------------------------|-------|------|-------|------|------|-------|
| hsa-miR-1306-3p              | 0.00  | 0.00 | 0.00  | 1.00 | 1.00 | -8.35 |
| hsa-miR-495-3p               | 0.00  | 0.00 | 0.00  | 1.00 | 1.00 | -8.35 |
| hsa-miR-3127-5p              | 0.00  | 0.00 | 0.00  | 1.00 | 1.00 | -8.35 |
| hsa-miR-1297                 | 0.00  | 0.00 | 0.00  | 1.00 | 1.00 | -8.35 |
| hsa-miR-664b-3p              | 0.00  | 0.00 | 0.00  | 1.00 | 1.00 | -8.35 |
| hsa-miR-1270                 | 0.00  | 0.00 | 0.00  | 1.00 | 1.00 | -8.35 |
| hsa-miR-514b-3p              | 0.00  | 0.00 | 0.00  | 1.00 | 1.00 | -8.35 |
| hsa-miR-198                  | 0.00  | 0.00 | 0.00  | 1.00 | 1.00 | -8.35 |
| hsa-miR-146b-5p              | 0.00  | 0.00 | 0.00  | 1.00 | 1.00 | -8.35 |
| hsa-miR-298                  | 0.00  | 0.00 | 0.00  | 1.00 | 1.00 | -8.35 |
| hsa-miR-936                  | 0.00  | 0.00 | 0.00  | 1.00 | 1.00 | -8.35 |
| hsa-miR-205-5p               | 4.04  | 4.08 | 2.26  | 0.10 | 1.00 | -6.34 |
| hsa-miR-520h                 | 0.00  | 0.00 | 0.00  | 1.00 | 1.00 | -8.35 |
| hsa-miR-506-5p               | 0.00  | 0.00 | 0.00  | 1.00 | 1.00 | -8.35 |
| hsa-miR-3131                 | 0.00  | 0.00 | 0.00  | 1.00 | 1.00 | -8.35 |
| hsa-miR-432-5p               | 0.00  | 0.00 | 0.00  | 1.00 | 1.00 | -8.35 |
| hsa-miR-548j-5p              | 0.00  | 0.00 | 0.00  | 1.00 | 1.00 | -8.35 |
| hsa-miR-1271-5p              | 0.00  | 0.00 | 0.00  | 1.00 | 1.00 | -8.35 |
| hsa-miR-4707-3p              | 0.00  | 0.00 | 0.00  | 1.00 | 1.00 | -8.35 |
| hsa-miR-548z+hsa-miR-548h-3p | 0.00  | 0.00 | 0.00  | 1.00 | 1.00 | -8.35 |
| hsa-miR-485-5p               | 0.00  | 0.00 | 0.00  | 1.00 | 1.00 | -8.35 |
| hsa-miR-331-3p               | -0.49 | 6.11 | -1.47 | 0.23 | 1.00 | -7.27 |
| hsa-miR-33a-5p               | -2.54 | 1.02 | -1.44 | 0.23 | 1.00 | -7.31 |
| hsa-miR-502-3p               | 0.00  | 0.00 | 0.00  | 1.00 | 1.00 | -8.35 |
| hsa-miR-605-5p               | 0.00  | 0.00 | 0.00  | 1.00 | 1.00 | -8.35 |
| hsa-miR-1178-3p              | 0.00  | 0.00 | 0.00  | 1.00 | 1.00 | -8.35 |
| hsa-miR-765                  | 0.00  | 0.00 | 0.00  | 1.00 | 1.00 | -8.35 |
| hsa-miR-517a-3p              | 0.00  | 0.00 | 0.00  | 1.00 | 1.00 | -8.35 |
| hsa-miR-3151-5p              | 0.00  | 0.00 | 0.00  | 1.00 | 1.00 | -8.35 |
| hsa-miR-661                  | 0.00  | 0.00 | 0.00  | 1.00 | 1.00 | -8.35 |



|                   |       |      |       |      |      |       |
|-------------------|-------|------|-------|------|------|-------|
| hsa-miR-1185-1-3p | 0.00  | 0.00 | 0.00  | 1.00 | 1.00 | -8.35 |
| hsa-miR-573       | 0.00  | 0.00 | 0.00  | 1.00 | 1.00 | -8.35 |
| hsa-miR-486-3p    | 0.00  | 0.00 | 0.00  | 1.00 | 1.00 | -8.35 |
| hsa-miR-382-3p    | 0.00  | 0.00 | 0.00  | 1.00 | 1.00 | -8.35 |
| hsa-miR-566       | 0.00  | 0.00 | 0.00  | 1.00 | 1.00 | -8.35 |
| hsa-miR-508-3p    | 0.00  | 0.00 | 0.00  | 1.00 | 1.00 | -8.35 |
| hsa-miR-411-5p    | 0.00  | 0.00 | 0.00  | 1.00 | 1.00 | -8.35 |
| hsa-miR-433-3p    | 0.00  | 0.00 | 0.00  | 1.00 | 1.00 | -8.35 |
| hsa-miR-590-3p    | 0.00  | 0.00 | 0.00  | 1.00 | 1.00 | -8.35 |
| hsa-miR-663a      | 0.00  | 0.00 | 0.00  | 1.00 | 1.00 | -8.35 |
| hsa-miR-638       | 0.00  | 0.00 | 0.00  | 1.00 | 1.00 | -8.35 |
| hsa-miR-4455      | 0.00  | 0.00 | 0.00  | 1.00 | 1.00 | -8.35 |
| hsa-let-7f-5p     | -1.30 | 9.43 | -2.94 | 0.05 | 1.00 | -5.57 |
| hsa-miR-1-5p      | 0.00  | 0.00 | 0.00  | 1.00 | 1.00 | -8.35 |
| hsa-miR-766-3p    | 0.00  | 0.00 | 0.00  | 1.00 | 1.00 | -8.35 |
| hsa-miR-641       | 0.00  | 0.00 | 0.00  | 1.00 | 1.00 | -8.35 |
| hsa-miR-211-3p    | 0.00  | 0.00 | 0.00  | 1.00 | 1.00 | -8.35 |
| hsa-miR-323b-5p   | 0.00  | 0.00 | 0.00  | 1.00 | 1.00 | -8.35 |
| hsa-miR-92a-1-5p  | 0.00  | 0.00 | 0.00  | 1.00 | 1.00 | -8.35 |
| hsa-miR-548ad-3p  | 0.00  | 0.00 | 0.00  | 1.00 | 1.00 | -8.35 |
| hsa-miR-562       | 0.00  | 0.00 | 0.00  | 1.00 | 1.00 | -8.35 |
| hsa-miR-296-5p    | -0.12 | 9.56 | -2.48 | 0.08 | 1.00 | -6.08 |
| hsa-miR-548ak     | 0.00  | 0.00 | 0.00  | 1.00 | 1.00 | -8.35 |
| hsa-miR-544a      | 0.00  | 0.00 | 0.00  | 1.00 | 1.00 | -8.35 |
| hsa-miR-361-5p    | 0.32  | 8.32 | 0.79  | 0.48 | 1.00 | -7.99 |
| hsa-miR-181c-5p   | 2.76  | 1.65 | 1.65  | 0.19 | 1.00 | -7.06 |
| hsa-miR-203a-3p   | -1.42 | 8.81 | -2.36 | 0.09 | 1.00 | -6.22 |
| hsa-miR-614       | 0.00  | 0.00 | 0.00  | 1.00 | 1.00 | -8.35 |
| hsa-miR-513c-5p   | 0.00  | 0.00 | 0.00  | 1.00 | 1.00 | -8.35 |
| hsa-miR-520e      | 0.00  | 0.00 | 0.00  | 1.00 | 1.00 | -8.35 |

|                                |       |       |       |      |      |       |
|--------------------------------|-------|-------|-------|------|------|-------|
| hsa-miR-1252-5p                | 0.00  | 0.00  | 0.00  | 1.00 | 1.00 | -8.35 |
| hsa-miR-4448                   | 0.00  | 0.00  | 0.00  | 1.00 | 1.00 | -8.35 |
| hsa-miR-892b                   | 0.00  | 0.00  | 0.00  | 1.00 | 1.00 | -8.35 |
| hsa-miR-874-3p                 | 0.00  | 0.00  | 0.00  | 1.00 | 1.00 | -8.35 |
| hsa-miR-134-5p+hsa-miR-6728-5p | 0.00  | 0.00  | 0.00  | 1.00 | 1.00 | -8.35 |
| hsa-miR-4431                   | 0.00  | 0.00  | 0.00  | 1.00 | 1.00 | -8.35 |
| hsa-miR-761                    | 0.00  | 0.00  | 0.00  | 1.00 | 1.00 | -8.35 |
| hsa-miR-6511a-5p               | 0.00  | 0.00  | 0.00  | 1.00 | 1.00 | -8.35 |
| hsa-miR-1304-3p                | 0.00  | 0.00  | 0.00  | 1.00 | 1.00 | -8.35 |
| hsa-miR-128-2-5p               | 0.00  | 0.00  | 0.00  | 1.00 | 1.00 | -8.35 |
| hsa-miR-30d-5p                 | -0.31 | 9.44  | -0.52 | 0.63 | 1.00 | -8.19 |
| hsa-miR-378c                   | 0.00  | 0.00  | 0.00  | 1.00 | 1.00 | -8.35 |
| hsa-miR-655-3p                 | 0.00  | 0.00  | 0.00  | 1.00 | 1.00 | -8.35 |
| hsa-miR-99b-5p                 | 0.58  | 10.36 | 1.16  | 0.32 | 1.00 | -7.62 |
| hsa-miR-4532                   | 0.00  | 0.00  | 0.00  | 1.00 | 1.00 | -8.35 |
| hsa-miR-206                    | 0.00  | 0.00  | 0.00  | 1.00 | 1.00 | -8.35 |
| hsa-miR-1269b                  | 0.00  | 0.00  | 0.00  | 1.00 | 1.00 | -8.35 |
| hsa-miR-510-5p                 | 0.00  | 0.00  | 0.00  | 1.00 | 1.00 | -8.35 |
| hsa-miR-628-5p                 | 0.00  | 0.00  | 0.00  | 1.00 | 1.00 | -8.35 |
| hsa-miR-2278                   | 0.00  | 0.00  | 0.00  | 1.00 | 1.00 | -8.35 |
| hsa-miR-1296-5p                | 0.00  | 0.00  | 0.00  | 1.00 | 1.00 | -8.35 |
| hsa-miR-664b-5p                | 0.00  | 0.00  | 0.00  | 1.00 | 1.00 | -8.35 |
| hsa-miR-483-5p                 | 0.00  | 0.00  | 0.00  | 1.00 | 1.00 | -8.35 |
| hsa-miR-125a-5p                | 0.42  | 11.35 | 1.59  | 0.20 | 1.00 | -7.13 |
| hsa-miR-3140-5p                | 0.00  | 0.00  | 0.00  | 1.00 | 1.00 | -8.35 |
| hsa-miR-3916                   | 0.00  | 0.00  | 0.00  | 1.00 | 1.00 | -8.35 |
| hsa-miR-1255b-5p               | 0.00  | 0.00  | 0.00  | 1.00 | 1.00 | -8.35 |
| hsa-miR-651-3p                 | 0.00  | 0.00  | 0.00  | 1.00 | 1.00 | -8.35 |
| hsa-miR-629-5p                 | -0.31 | 0.12  | -1.44 | 0.23 | 1.00 | -7.31 |
| hsa-miR-3065-5p                | 2.33  | 1.40  | 1.65  | 0.19 | 1.00 | -7.07 |

|                 |       |      |       |      |      |       |
|-----------------|-------|------|-------|------|------|-------|
| hsa-miR-520b    | 0.00  | 0.00 | 0.00  | 1.00 | 1.00 | -8.35 |
| hsa-miR-3605-3p | 0.00  | 0.00 | 0.00  | 1.00 | 1.00 | -8.35 |
| hsa-miR-548d-3p | 0.00  | 0.00 | 0.00  | 1.00 | 1.00 | -8.35 |
| hsa-miR-494-5p  | 0.00  | 0.00 | 0.00  | 1.00 | 1.00 | -8.35 |
| hsa-miR-624-3p  | 0.00  | 0.00 | 0.00  | 1.00 | 1.00 | -8.35 |
| hsa-miR-221-5p  | 0.00  | 0.00 | 0.00  | 1.00 | 1.00 | -8.35 |
| hsa-miR-520a-3p | 0.00  | 0.00 | 0.00  | 1.00 | 1.00 | -8.35 |
| hsa-miR-924     | 0.00  | 0.00 | 0.00  | 1.00 | 1.00 | -8.35 |
| hsa-miR-512-3p  | 0.00  | 0.00 | 0.00  | 1.00 | 1.00 | -8.35 |
| hsa-miR-766-5p  | 0.00  | 0.00 | 0.00  | 1.00 | 1.00 | -8.35 |
| hsa-miR-548h-5p | 0.00  | 0.00 | 0.00  | 1.00 | 1.00 | -8.35 |
| hsa-miR-297     | 0.00  | 0.00 | 0.00  | 1.00 | 1.00 | -8.35 |
| hsa-miR-30a-5p  | -0.32 | 3.01 | -0.11 | 0.92 | 1.00 | -8.35 |
| hsa-miR-362-3p  | -2.47 | 1.23 | -1.31 | 0.27 | 1.00 | -7.46 |
| hsa-miR-548q    | 0.00  | 0.00 | 0.00  | 1.00 | 1.00 | -8.35 |
| hsa-miR-146b-3p | 0.00  | 0.00 | 0.00  | 1.00 | 1.00 | -8.35 |
| hsa-miR-182-5p  | -1.29 | 7.43 | -2.97 | 0.05 | 1.00 | -5.54 |
| hsa-miR-1301-3p | 0.00  | 0.00 | 0.00  | 1.00 | 1.00 | -8.35 |
| hsa-miR-494-3p  | 0.00  | 0.00 | 0.00  | 1.00 | 1.00 | -8.35 |
| hsa-miR-452-5p  | 0.00  | 0.00 | 0.00  | 1.00 | 1.00 | -8.35 |
| hsa-miR-599     | 0.00  | 0.00 | 0.00  | 1.00 | 1.00 | -8.35 |
| hsa-miR-1286    | 0.00  | 0.00 | 0.00  | 1.00 | 1.00 | -8.35 |
| hsa-miR-501-3p  | 0.00  | 0.00 | 0.00  | 1.00 | 1.00 | -8.35 |
| hsa-miR-1915-3p | 0.00  | 0.00 | 0.00  | 1.00 | 1.00 | -8.35 |
| hsa-miR-409-5p  | 0.00  | 0.00 | 0.00  | 1.00 | 1.00 | -8.35 |
