# Supplementary material for: Relationship of micro-RNA, mRNA and eIF Expression in Tamoxifen-Adapted MCF-7 Breast Cancer Cells: Impact of miR-1972 on Gene Expression, Proliferation and Migration
Source: MDPI journal article supplement (doi:10.3390/biom12070916), 2022-06-29
Supplement: s1 [file s1]

Table S3 A. Pathway enrichment analysis for tamoxifen regulated miRNAs.

Predicted target genes of the tamoxifen regulated miRNAs that were also regulated by tamoxifen adaption were pooled and submitted for pathway enrichment analysis to the EnrichR website. Results are shown for  $p_{adj} < 0.05$ .

KEGG pathway enrichment

| Term                                    | Overlap | P-value  | Adjusted P-value | Odds Ratio  | Combined Score | Genes                                                        |
|-----------------------------------------|---------|----------|------------------|-------------|----------------|--------------------------------------------------------------|
| Leishmaniasis                           | 6/77    | 2.31E-04 | 0.042510861      | 7.603318541 | 63.66073308    | C3;NFKBIA;HLA-DRB5;HLA-DPB1;FOS;HLA-DRB1                     |
| Morphine addiction                      | 6/91    | 5.70E-04 | 0.042510861      | 6.346494762 | 47.40443199    | GABBR2;PDE4D;ADORA1;PDE8B;ADCY5;KCNJ3                        |
| Th1 and Th2 cell differentiation        | 6/92    | 6.04E-04 | 0.042510861      | 6.272379739 | 46.48612117    | NFKBIA;HLA-DRB5;JAG1;HLA-DPB1;FOS;HLA-DRB1                   |
| Human T-cell leukemia virus 1 infection | 9/219   | 8.66E-04 | 0.045696296      | 3.881944444 | 27.37276189    | NFKBIA;EGR1;NRP1;HLA-DRB5;MAP3K1;HLA-DPB1;FOS;HLA-DRB1;ADCY5 |

GEO kinase perturbations up

| Term                             | Overlap | P-value     | Adjusted P-value | Odds Ratio  | Combined Score | Genes                                                                                                 |
|----------------------------------|---------|-------------|------------------|-------------|----------------|-------------------------------------------------------------------------------------------------------|
| LRRK2 activemutant 159 GSE36321  | 17/300  | 5.57E-08    | 7.61E-06         | 5.629315031 | 94.02315985    | MAP3K1;LIMCH1;LUM;PCDH7;SAMD4A;LAMC1;NR3C1;SYNE1;SLC7A5;RAB31;DRAM1;KLF5;PLAU;SYNDIG1;CPE;STXBP6;TNS3 |
| LRRK2 mutant 33 GDS4401          | 17/300  | 5.57E-08    | 7.61E-06         | 5.629315031 | 94.02315985    | MAP3K1;LIMCH1;LUM;PCDH7;SAMD4A;LAMC1;NR3C1;SYNE1;SLC7A5;RAB31;DRAM1;KLF5;PLAU;SYNDIG1;CPE;STXBP6;TNS3 |
| FGFR3 druginhibition 36 GDS5023  | 16/300  | 3.15E-07    | 2.15E-05         | 5.253992857 | 78.64961128    | SEMA5A;AHNAK;IGFBP5;PCDH7;RIPK4;TNFAIP2;PTK6;LAMC1;NFKBIA;AR;TOM1L2;RCAN1;PPP1R3B;PACS1;ERBB4;ST3GAL1 |
| BRAF overexpression 180 GSE46801 | 16/300  | 3.15E-07    | 2.15E-05         | 5.253992857 | 78.64961128    | EGR1;NRP1;SLC14A1;B4GALT1;KCNK10;FAM46C;TNFRSF11B;INHBA;NR3C1;C3;RAB31;S100A16;PODXL;CPE;TGFB1;RGL1   |
| CDK19 knockdown 162 GSE38061     | 12/300  | 1.59E-04    | 0.006200996      | 3.812010955 | 33.34216183    | TOM1L2;ALDH1A3;TCF7L1;SYT1;PODXL;OSBPL3;SCNN1A;PDK4;SPRY1;TNS4;CDC42BPA;ZFP36L1                       |
| CDK8 knockdown 163 GSE38061      | 12/300  | 1.59E-04    | 0.006200996      | 3.812010955 | 33.34216183    | NFKBIA;TOM1L2;ALDH1A3;JAG1;PLAU;TESC;SUSD1;GRHL3;ANTXR2;TNS4;BLVRA;ZFP36L1                            |
| ROCK2 knockdown 157 GSE34769     | 12/300  | 1.59E-04    | 0.006200996      | 3.812010955 | 33.34216183    | C3;NFKBIA;SGCE;EGR1;PLAU;PDK4;ANKS6;IRF8;CHAC1;FOS;PARP8;ZFP36L1                                      |
| CDK8 knockdown 161 GSE38061      | 11/300  | 6.18E-04    | 0.018745182      | 3.465802154 | 25.60903989    | NFKBIA;TOM1L2;JAG1;KLF5;AHNAK;TNFAIP2;AK4;TNS4;CDC42BPA;HS3ST1;ZFP36L1                                |
| ERBB3 drugactivation 70 GSE21463 | 11/300  | 6.18E-04    | 0.018745182      | 3.465802154 | 25.60903989    | DOCK10;SGCE;PREX1;TOM1L2;EHD3;LIMCH1;PSD3;CPE;LDLRAD4;CDC42BPA;SYNE1                                  |
| ULK1 knockout 198 GSE60778       | 10/300  | 0.002195838 | 0.046112597      | 3.125100241 | 19.12933717    | ST6GAL1;TCF7L1;AHNAK;SLC17A5;SAMD4A;COL4A6;SMS;CDC42BPA;KAZALD1;DCLK1                                 |
| ULK1 knockout 197 GSE60778       | 10/300  | 0.002195838 | 0.046112597      | 3.125100241 | 19.12933717    | SOCS2;ST6GAL1;TCF7L1;LURAP1L;MAP2;SALL4;ANG;SULF1;CDC42BPA;JDP2                                       |
| SNRK overexpression 127 GSE30185 | 10/300  | 0.002195838 | 0.046112597      | 3.125100241 | 19.12933717    | GABBR2;ALDH1A3;RAB31;CXCL12;TPK1;RAB15;GFRA1;MBP;MAPK4;UGT1A6                                         |
| HIPK2 defectivemutant 29 GDS4233 | 10/300  | 0.002195838 | 0.046112597      | 3.125100241 | 19.12933717    | DOCK10;NRP1;BACE2;DEPTOR;IGFBP5;PCDH10;FAM46C;FAXDC2;GPR65;PCDH7                                      |

GEO kinase perturbations down

| Term                             | Overlap | P-value  | Adjusted P-value | Odds Ratio  | Combined Score | Genes                                                                                            |
|----------------------------------|---------|----------|------------------|-------------|----------------|--------------------------------------------------------------------------------------------------|
| PLK1 druginhibition 181 GSE46856 | 14/300  | 8.22E-06 | 0.002220049      | 4.521360156 | 52.93901535    | MESP1;IGFBP5;TESC;C15ORF52;UBE2QL1;KAZALD1;C6ORF211;PAK1;ZNF618;TRIM29;RAB15;PLEKHO1;TNS4;SAMD12 |
| EGFR drugactivation 30 GDS4361   | 12/300  | 1.59E-04 | 0.021464985      | 3.812010955 | 33.34216183    | C3;ALDH1A3;ST6GAL1;B4GALT1;SH3PXD2A;PPP1R3B;PLAU;RIPK4;TNFRSF11B;FOS;TNS3;ZFP36L1                |

|            |                                     |                                                                                                                                                                                                                                                                 |                |                  |               |                |                            |             |      |
|------------|-------------------------------------|-----------------------------------------------------------------------------------------------------------------------------------------------------------------------------------------------------------------------------------------------------------------|----------------|------------------|---------------|----------------|----------------------------|-------------|------|
| Table S3 B |                                     | Pathway enrichment analysis using the GEO kinase up/down perturbations associated with the Tamoxifen regulated miRNAs<br>The list of 15 kinases was analyzed by the EnrichR website. An adjusted p-value of less than 0.01 was required to appear in this list. |                |                  |               |                |                            |             |      |
| KEGG 2021  | Kinases used for this analysis:     | BRAF<br>FGFR3                                                                                                                                                                                                                                                   | CDK19<br>HIPK2 | CDK8<br>JAK2     | DDR1<br>LRRK2 | EGFR<br>PLK1   | ERBB3<br>ROCK2             | SNRK<br>SYK | ULK1 |
|            | Term                                | Overlap                                                                                                                                                                                                                                                         | P-value        | Adjusted P-value | Odds Ratio    | Combined Score | Genes                      |             |      |
|            | Bladder cancer                      | 3/41                                                                                                                                                                                                                                                            | 3.58E-06       | 2.41E-04         | 1.31E+02      | 1645.78        | BRAF;FGFR3;EGFR            |             |      |
|            | PI3K-Akt signaling pathway          | 5/354                                                                                                                                                                                                                                                           | 4.38E-06       | 2.41E-04         | 2.81E+01      | 347.08         | SYK;ERBB3;JAK2;FGFR3;EGFR  |             |      |
|            | Proteoglycans in cancer             | 4/205                                                                                                                                                                                                                                                           | 1.34E-05       | 4.69E-04         | 3.58E+01      | 401.62         | ERBB3;ROCK2;BRAF;EGFR      |             |      |
|            | Regulation of actin cytoskeleton    | 4/218                                                                                                                                                                                                                                                           | 1.71E-05       | 4.69E-04         | 3.36E+01      | 368.84         | ROCK2;BRAF;FGFR3;EGFR      |             |      |
|            | Pathways in cancer                  | 5/531                                                                                                                                                                                                                                                           | 3.12E-05       | 5.96E-04         | 1.85E+01      | 191.92         | ROCK2;BRAF;JAK2;FGFR3;EGFR |             |      |
|            | ErbB signaling pathway              | 3/85                                                                                                                                                                                                                                                            | 3.25E-05       | 5.96E-04         | 6.07E+01      | 627.11         | ERBB3;BRAF;EGFR            |             |      |
|            | MAPK signaling pathway              | 4/294                                                                                                                                                                                                                                                           | 5.50E-05       | 8.64E-04         | 2.47E+01      | 242.24         | ERBB3;BRAF;FGFR3;EGFR      |             |      |
|            | FoxO signaling pathway              | 3/131                                                                                                                                                                                                                                                           | 1.18E-04       | 1.62E-03         | 3.88E+01      | 350.80         | PLK1;BRAF;EGFR             |             |      |
|            | Chemokine signaling pathway         | 3/192                                                                                                                                                                                                                                                           | 3.64E-04       | 4.45E-03         | 2.62E+01      | 207.35         | ROCK2;BRAF;JAK2            |             |      |
|            | Focal adhesion                      | 3/201                                                                                                                                                                                                                                                           | 4.16E-04       | 4.58E-03         | 2.50E+01      | 194.48         | ROCK2;BRAF;EGFR            |             |      |
|            | Rap1 signaling pathway              | 3/210                                                                                                                                                                                                                                                           | 4.73E-04       | 4.73E-03         | 2.39E+01      | 182.88         | BRAF;FGFR3;EGFR            |             |      |
|            | Calcium signaling pathway           | 3/240                                                                                                                                                                                                                                                           | 6.98E-04       | 6.40E-03         | 2.08E+01      | 151.39         | ERBB3;FGFR3;EGFR           |             |      |
|            | Endometrial cancer                  | 2/58                                                                                                                                                                                                                                                            | 8.47E-04       | 7.17E-03         | 5.48E+01      | 387.29         | BRAF;EGFR                  |             |      |
|            | Central carbon metabolism in cancer | 2/70                                                                                                                                                                                                                                                            | 1.23E-03       | 8.46E-03         | 4.51E+01      | 301.90         | FGFR3;EGFR                 |             |      |
|            | Melanoma                            | 2/72                                                                                                                                                                                                                                                            | 1.30E-03       | 8.46E-03         | 4.38E+01      | 290.80         | BRAF;EGFR                  |             |      |
|            | Non-small cell lung cancer          | 2/72                                                                                                                                                                                                                                                            | 1.30E-03       | 8.46E-03         | 4.38E+01      | 290.80         | BRAF;EGFR                  |             |      |
|            | Glioma                              | 2/75                                                                                                                                                                                                                                                            | 1.41E-03       | 8.46E-03         | 4.20E+01      | 275.41         | BRAF;EGFR                  |             |      |
|            | Pancreatic cancer                   | 2/76                                                                                                                                                                                                                                                            | 1.45E-03       | 8.46E-03         | 4.14E+01      | 270.59         | BRAF;EGFR                  |             |      |
|            | MicroRNAs in cancer                 | 3/310                                                                                                                                                                                                                                                           | 1.46E-03       | 8.46E-03         | 1.60E+01      | 104.61         | ERBB3;FGFR3;EGFR           |             |      |

| Reactome 2016                                                    |         |          |                  |             |                |                                                                                      |  |  |  |
|------------------------------------------------------------------|---------|----------|------------------|-------------|----------------|--------------------------------------------------------------------------------------|--|--|--|
| Term                                                             | Overlap | P-value  | Adjusted P-value | Odds Ratio  | Combined Score | Genes                                                                                |  |  |  |
| Signaling by SCF-KIT Homo sapiens R-HSA-1433557                  | 16/325  | 5.02E-20 | 0.000            | 53.56770567 | 2380.48879     | SRC;INSR;BRAF;PIK3R1;EGFR;FER;ERBB3;ERBB4;FES;ERBB2;JAK2;JAK3;FGFR3;FGFR2;JAK1;FGFR1 |  |  |  |
| Interleukin-3. 5 and GM-CSF signaling Homo sapiens R-HSA-512988  | 15/261  | 9.31E-20 | 0.000            | 60.11890244 | 2634.46995     | SYK;SRC;BRAF;PIK3R1;EGFR;HCK;ERBB3;ERBB4;ERBB2;JAK2;JAK3;FGFR3;FGFR2;JAK1;FGFR1      |  |  |  |
| Signaling by Interleukins Homo sapiens R-HSA-449147              | 16/392  | 1.01E-18 | 0.000            | 43.87234043 | 1817.879507    | SYK;SRC;BRAF;PIK3R1;TYK2;EGFR;HCK;ERBB3;ERBB4;ERBB2;JAK2;JAK3;FGFR3;FGFR2;JAK1;FGFR1 |  |  |  |
| Fc epsilon receptor (FCER1) signaling Homo sapiens R-HSA-2454202 | 16/395  | 1.14E-18 | 0.000            | 43.51840022 | 1797.91999     | SYK;SRC;TXK;INSR;BRAF;PIK3R1;EGFR;ERBB3;ERBB4;ERBB2;JAK2;JAK3;FGFR3;FGFR2;JAK1;FGFR1 |  |  |  |
| Interleukin-2 signaling Homo sapiens R-HSA-451927                | 14/252  | 3.24E-18 | 0.000            | 55.25770308 | 2225.264603    | SYK;SRC;BRAF;PIK3R1;EGFR;ERBB3;ERBB4;ERBB2;JAK2;JAK3;FGFR3;FGFR2;JAK1;FGFR1          |  |  |  |
| DAP12 signaling Homo sapiens R-HSA-2424491                       | 15/344  | 5.98E-18 | 0.000            | 44.76291793 | 1775.187564    | SYK;SRC;INSR;BRAF;PIK3R1;EGFR;ERBB3;ERBB4;ERBB2;JAK2;JAK3;FGFR3;FGFR2;JAK1;FGFR1     |  |  |  |
| DAP12 interactions Homo sapiens R-HSA-2172127                    | 15/359  | 1.13E-17 | 0.000            | 42.77834302 | 1669.146141    | SYK;SRC;INSR;BRAF;PIK3R1;EGFR;ERBB3;ERBB4;ERBB2;JAK2;JAK3;FGFR3;FGFR2;JAK1;FGFR1     |  |  |  |
| Insulin receptor signalling cascade Homo sapiens R-HSA-74751     | 14/287  | 2.02E-17 | 0.000            | 48.08791209 | 1848.451211    | SRC;INSR;BRAF;PIK3R1;EGFR;ERBB3;ERBB4;ERBB2;JAK2;JAK3;FGFR3;FGFR2;JAK1;FGFR1         |  |  |  |
| Signaling by Insulin receptor Homo sapiens R-HSA-74752           | 14/311  | 6.24E-17 | 0.000            | 44.14814815 | 1647.309223    | SRC;INSR;BRAF;PIK3R1;EGFR;ERBB3;ERBB4;ERBB2;JAK2;JAK3;FGFR3;FGFR2;JAK1;FGFR1         |  |  |  |
| VEGFA-VEGFR2 Pathway Homo sapiens R-HSA-4420097                  | 14/320  | 9.30E-17 | 0.000            | 42.83006536 | 1581.040924    | ROCK2;SRC;BRAF;PIK3R1;EGFR;ERBB3;ERBB4;ERBB2;JAK2;JAK3;FGFR3;FGFR2;JAK1;FGFR1        |  |  |  |
| MAPK1/MAPK3 signaling Homo sapiens R-HSA-5684996                 | 13/241  | 9.52E-17 | 0.000            | 51.15251196 | 1887.044521    | SRC;BRAF;TYK2;EGFR;ERBB3;ERBB4;ERBB2;JAK2;JAK3;FGFR3;FGFR2;JAK1;FGFR1                |  |  |  |

|                                                                                              |        |          |       |             |             |                                                                                           |
|----------------------------------------------------------------------------------------------|--------|----------|-------|-------------|-------------|-------------------------------------------------------------------------------------------|
| Interleukin receptor SHC signaling Homo sapiens R-HSA-912526                                 | 13/245 | 1.18E-16 | 0.000 | 50.26038401 | 1843.309999 | SRC;BRAF;PIK3R1;EGFR;ERBB3;ERBB4;ERBB2;JAK2;JAK3;FGFR3;FGFR2;JAK1;FGFR1                   |
| Signaling by VEGF Homo sapiens R-HSA-194138                                                  | 14/328 | 1.31E-16 | 0.000 | 41.72186837 | 1525.743187 | ROCK2;SRC;BRAF;PIK3R1;EGFR;ERBB3;ERBB4;ERBB2;JAK2;JAK3;FGFR3;FGFR2;JAK1;FGFR1             |
| Downstream signaling of activated FGFR2 Homo sapiens R-HSA-5654696                           | 14/329 | 1.37E-16 | 0.000 | 41.58730159 | 1519.055027 | SRC;INSR;BRAF;PIK3R1;EGFR;ERBB3;ERBB4;ERBB2;JAK2;JAK3;FGFR3;FGFR2;JAK1;FGFR1              |
| Downstream signaling of activated FGFR4 Homo sapiens R-HSA-5654716                           | 14/329 | 1.37E-16 | 0.000 | 41.58730159 | 1519.055027 | SRC;INSR;BRAF;PIK3R1;EGFR;ERBB3;ERBB4;ERBB2;JAK2;JAK3;FGFR3;FGFR2;JAK1;FGFR1              |
| Downstream signaling of activated FGFR3 Homo sapiens R-HSA-5654708                           | 14/329 | 1.37E-16 | 0.000 | 41.58730159 | 1519.055027 | SRC;INSR;BRAF;PIK3R1;EGFR;ERBB3;ERBB4;ERBB2;JAK2;JAK3;FGFR3;FGFR2;JAK1;FGFR1              |
| Signaling by ERBB4 Homo sapiens R-HSA-1236394                                                | 14/330 | 1.43E-16 | 0.000 | 41.4535865  | 1512.414961 | SRC;INSR;BRAF;PIK3R1;EGFR;ERBB3;ERBB4;ERBB2;JAK2;JAK3;FGFR3;FGFR2;JAK1;FGFR1              |
| PI5P. PP2A and IER3 Regulate PI3K/AKT Signaling Homo sapiens R-HSA-6811558                   | 10/83  | 1.46E-16 | 0.000 | 108.9972603 | 3974.472929 | ERBB3;SRC;ERBB4;INSR;ERBB2;PIK3R1;FGFR3;EGFR;FGFR2;FGFR1                                  |
| Signaling by FGFR4 Homo sapiens R-HSA-5654743                                                | 14/332 | 1.55E-16 | 0.000 | 41.18867925 | 1499.277157 | SRC;INSR;BRAF;PIK3R1;EGFR;ERBB3;ERBB4;ERBB2;JAK2;JAK3;FGFR3;FGFR2;JAK1;FGFR1              |
| Downstream signaling of activated FGFR1 Homo sapiens R-HSA-5654687                           | 14/332 | 1.55E-16 | 0.000 | 41.18867925 | 1499.277157 | SRC;INSR;BRAF;PIK3R1;EGFR;ERBB3;ERBB4;ERBB2;JAK2;JAK3;FGFR3;FGFR2;JAK1;FGFR1              |
| Signaling by FGFR3 Homo sapiens R-HSA-5654741                                                | 14/333 | 1.62E-16 | 0.000 | 41.05747126 | 1492.778457 | SRC;INSR;BRAF;PIK3R1;EGFR;ERBB3;ERBB4;ERBB2;JAK2;JAK3;FGFR3;FGFR2;JAK1;FGFR1              |
| Signaling by FGFR1 Homo sapiens R-HSA-5654736                                                | 14/336 | 1.84E-16 | 0.000 | 40.66873706 | 1473.557531 | SRC;INSR;BRAF;PIK3R1;EGFR;ERBB3;ERBB4;ERBB2;JAK2;JAK3;FGFR3;FGFR2;JAK1;FGFR1              |
| Downstream signal transduction Homo sapiens R-HSA-186763                                     | 14/341 | 2.26E-16 | 0.000 | 40.03669725 | 1442.41271  | SRC;INSR;BRAF;PIK3R1;EGFR;ERBB3;ERBB4;ERBB2;JAK2;JAK3;FGFR3;FGFR2;JAK1;FGFR1              |
| Negative regulation of the PI3K/AKT network Homo sapiens R-HSA-199418                        | 10/90  | 3.40E-16 | 0.000 | 99.425      | 3541.189994 | ERBB3;SRC;ERBB4;INSR;ERBB2;PIK3R1;FGFR3;EGFR;FGFR2;FGFR1                                  |
| Signaling by EGFR Homo sapiens R-HSA-177929                                                  | 14/355 | 3.95E-16 | 0.000 | 38.3655914  | 1360.715523 | SRC;INSR;BRAF;PIK3R1;EGFR;ERBB3;ERBB4;ERBB2;JAK2;JAK3;FGFR3;FGFR2;JAK1;FGFR1              |
| Signaling by FGFR2 Homo sapiens R-HSA-5654738                                                | 14/361 | 4.99E-16 | 0.000 | 37.69068204 | 1327.994762 | SRC;INSR;BRAF;PIK3R1;EGFR;ERBB3;ERBB4;ERBB2;JAK2;JAK3;FGFR3;FGFR2;JAK1;FGFR1              |
| Signaling by PDGF Homo sapiens R-HSA-186797                                                  | 14/364 | 5.60E-16 | 0.000 | 37.36190476 | 1312.113634 | SRC;INSR;BRAF;PIK3R1;EGFR;ERBB3;ERBB4;ERBB2;JAK2;JAK3;FGFR3;FGFR2;JAK1;FGFR1              |
| Signaling by FGFR Homo sapiens R-HSA-190236                                                  | 14/366 | 6.04E-16 | 0.000 | 37.14583333 | 1301.697731 | SRC;INSR;BRAF;PIK3R1;EGFR;ERBB3;ERBB4;ERBB2;JAK2;JAK3;FGFR3;FGFR2;JAK1;FGFR1              |
| MAPK family signaling cascades Homo sapiens R-HSA-5683057                                    | 13/284 | 8.10E-16 | 0.000 | 42.94230124 | 1492.244021 | SRC;BRAF;TYK2;EGFR;ERBB3;ERBB4;ERBB2;JAK2;JAK3;FGFR3;FGFR2;JAK1;FGFR1                     |
| IRS-mediated signalling Homo sapiens R-HSA-112399                                            | 13/284 | 8.10E-16 | 0.000 | 42.94230124 | 1492.244021 | SRC;BRAF;PIK3R1;EGFR;ERBB3;ERBB4;ERBB2;JAK2;JAK3;FGFR3;FGFR2;JAK1;FGFR1                   |
| NGF signalling via TRKA from the plasma membrane Homo sapiens R-HSA-187037                   | 14/374 | 8.16E-16 | 0.000 | 36.30555556 | 1261.352801 | SRC;INSR;BRAF;PIK3R1;EGFR;ERBB3;ERBB4;ERBB2;JAK2;JAK3;FGFR3;FGFR2;JAK1;FGFR1              |
| IGF1R signaling cascade Homo sapiens R-HSA-2428924                                           | 13/288 | 9.71E-16 | 0.000 | 42.30909091 | 1462.555817 | SRC;BRAF;PIK3R1;EGFR;ERBB3;ERBB4;ERBB2;JAK2;JAK3;FGFR3;FGFR2;JAK1;FGFR1                   |
| Signaling by Type 1 Insulin-like Growth Factor 1 Receptor (IGF1R) Homo sapiens R-HSA-2404192 | 13/288 | 9.71E-16 | 0.000 | 42.30909091 | 1462.555817 | SRC;BRAF;PIK3R1;EGFR;ERBB3;ERBB4;ERBB2;JAK2;JAK3;FGFR3;FGFR2;JAK1;FGFR1                   |
| IRS-related events triggered by IGF1R Homo sapiens R-HSA-2428928                             | 13/288 | 9.71E-16 | 0.000 | 42.30909091 | 1462.555817 | SRC;BRAF;PIK3R1;EGFR;ERBB3;ERBB4;ERBB2;JAK2;JAK3;FGFR3;FGFR2;JAK1;FGFR1                   |
| FCERI mediated MAPK activation Homo sapiens R-HSA-2871796                                    | 13/289 | 1.02E-15 | 0.000 | 42.15365613 | 1455.286076 | SYK;SRC;BRAF;EGFR;ERBB3;ERBB4;ERBB2;JAK2;JAK3;FGFR3;FGFR2;JAK1;FGFR1                      |
| Cytokine Signaling in Immune system Homo sapiens R-HSA-1280215                               | 16/620 | 1.41E-15 | 0.000 | 26.99337748 | 923.0016881 | SYK;SRC;BRAF;PIK3R1;TYK2;EGFR;HCK;ERBB3;ERBB4;ERBB2;JAK2;JAK3;FGFR3;FGFR2;JAK1;FGFR1      |
| Role of LAT2/NTAL/LAB on calcium mobilization Homo sapiens R-HSA-2730905                     | 11/162 | 2.46E-15 | 0.000 | 60.14183223 | 2023.009361 | ERBB3;SYK;SRC;ERBB4;INSR;ERBB2;PIK3R1;FGFR3;EGFR;FGFR2;FGFR1                              |
| GRB2 events in EGFR signaling Homo sapiens R-HSA-179812                                      | 12/235 | 3.43E-15 | 0.000 | 46.18912069 | 1538.345703 | ERBB3;SRC;ERBB4;ERBB2;BRAF;JAK2;JAK3;FGFR3;EGFR;FGFR2;JAK1;FGFR1                          |
| SHC1 events in EGFR signaling Homo sapiens R-HSA-180336                                      | 12/235 | 3.43E-15 | 0.000 | 46.18912069 | 1538.345703 | ERBB3;SRC;ERBB4;ERBB2;BRAF;JAK2;JAK3;FGFR3;EGFR;FGFR2;JAK1;FGFR1                          |
| SOS-mediated signalling Homo sapiens R-HSA-112412                                            | 12/235 | 3.43E-15 | 0.000 | 46.18912069 | 1538.345703 | ERBB3;SRC;ERBB4;ERBB2;BRAF;JAK2;JAK3;FGFR3;EGFR;FGFR2;JAK1;FGFR1                          |
| SHC1 events in ERBB4 signaling Homo sapiens R-HSA-1250347                                    | 12/235 | 3.43E-15 | 0.000 | 46.18912069 | 1538.345703 | ERBB3;SRC;ERBB4;ERBB2;BRAF;JAK2;JAK3;FGFR3;EGFR;FGFR2;JAK1;FGFR1                          |
| RAF/MAP kinase cascade Homo sapiens R-HSA-5673001                                            | 12/235 | 3.43E-15 | 0.000 | 46.18912069 | 1538.345703 | ERBB3;SRC;ERBB4;ERBB2;BRAF;JAK2;JAK3;FGFR3;EGFR;FGFR2;JAK1;FGFR1                          |
| FRS-mediated FGFR2 signaling Homo sapiens R-HSA-5654700                                      | 12/236 | 3.61E-15 | 0.000 | 45.98059006 | 1529.050213 | ERBB3;SRC;ERBB4;ERBB2;BRAF;JAK2;JAK3;FGFR3;EGFR;FGFR2;JAK1;FGFR1                          |
| FRS-mediated FGFR4 signaling Homo sapiens R-HSA-5654712                                      | 12/236 | 3.61E-15 | 0.000 | 45.98059006 | 1529.050213 | ERBB3;SRC;ERBB4;ERBB2;BRAF;JAK2;JAK3;FGFR3;EGFR;FGFR2;JAK1;FGFR1                          |
| FRS-mediated FGFR3 signaling Homo sapiens R-HSA-5654706                                      | 12/236 | 3.61E-15 | 0.000 | 45.98059006 | 1529.050213 | ERBB3;SRC;ERBB4;ERBB2;BRAF;JAK2;JAK3;FGFR3;EGFR;FGFR2;JAK1;FGFR1                          |
| FRS-mediated FGFR1 signaling Homo sapiens R-HSA-5654693                                      | 12/236 | 3.61E-15 | 0.000 | 45.98059006 | 1529.050213 | ERBB3;SRC;ERBB4;ERBB2;BRAF;JAK2;JAK3;FGFR3;EGFR;FGFR2;JAK1;FGFR1                          |
| Innate Immune System Homo sapiens R-HSA-168249                                               | 17/807 | 3.87E-15 | 0.000 | 22.92369902 | 760.7237858 | 1 SYK;SRC;TXK;INSR;BRAF;PIK3R1;EGFR;HCK;ERBB3;ERBB4;ERBB2;JAK2;JAK3;FGFR3;FGFR2;JAK1;FGFR |
| ARMS-mediated activation Homo sapiens R-HSA-170984                                           | 12/239 | 4.21E-15 | 0.000 | 45.36602183 | 1501.717726 | ERBB3;SRC;ERBB4;ERBB2;BRAF;JAK2;JAK3;FGFR3;EGFR;FGFR2;JAK1;FGFR1                          |
| Signalling to p38 via RIT and RIN Homo sapiens R-HSA-187706                                  | 12/239 | 4.21E-15 | 0.000 | 45.36602183 | 1501.717726 | ERBB3;SRC;ERBB4;ERBB2;BRAF;JAK2;JAK3;FGFR3;EGFR;FGFR2;JAK1;FGFR1                          |

|                                                                                 |         |          |       |             |             |                                                                                                                                                                                                                   |
|---------------------------------------------------------------------------------|---------|----------|-------|-------------|-------------|-------------------------------------------------------------------------------------------------------------------------------------------------------------------------------------------------------------------|
| Frs2-mediated activation Homo sapiens R-HSA-170968                              | 12/240  | 4.42E-15 | 0.000 | 45.16475973 | 1492.787213 | ERBB3;SRC;ERBB4;ERBB2;BRAF;JAK2;JAK3;FGFR3;EGFR;FGFR2;JAK1;FGFR1                                                                                                                                                  |
| Prolonged ERK activation events Homo sapiens R-HSA-169893                       | 12/242  | 4.89E-15 | 0.000 | 44.76748582 | 1475.189092 | ERBB3;SRC;ERBB4;ERBB2;BRAF;JAK2;JAK3;FGFR3;EGFR;FGFR2;JAK1;FGFR1                                                                                                                                                  |
| Signaling by Leptin Homo sapiens R-HSA-2586552                                  | 12/243  | 5.14E-15 | 0.000 | 44.57142857 | 1466.519041 | ERBB3;SRC;ERBB4;ERBB2;BRAF;JAK2;JAK3;FGFR3;EGFR;FGFR2;JAK1;FGFR1                                                                                                                                                  |
| Signalling to RAS Homo sapiens R-HSA-167044                                     | 12/246  | 5.95E-15 | 0.000 | 43.99331104 | 1441.010724 | ERBB3;SRC;ERBB4;ERBB2;BRAF;JAK2;JAK3;FGFR3;EGFR;FGFR2;JAK1;FGFR1                                                                                                                                                  |
| VEGFR2 mediated cell proliferation Homo sapiens R-HSA-5218921                   | 12/248  | 6.56E-15 | 0.000 | 43.61606485 | 1424.411965 | ERBB3;SRC;ERBB4;ERBB2;BRAF;JAK2;JAK3;FGFR3;EGFR;FGFR2;JAK1;FGFR1                                                                                                                                                  |
| PI-3K cascade:FGFR1 Homo sapiens R-HSA-5654689                                  | 10/122  | 7.91E-15 | 0.000 | 70.90357143 | 2302.327214 | ERBB3;SRC;ERBB4;INSR;ERBB2;PIK3R1;FGFR3;EGFR;FGFR2;FGFR1                                                                                                                                                          |
| PI-3K cascade:FGFR3 Homo sapiens R-HSA-5654710                                  | 10/122  | 7.91E-15 | 0.000 | 70.90357143 | 2302.327214 | ERBB3;SRC;ERBB4;INSR;ERBB2;PIK3R1;FGFR3;EGFR;FGFR2;FGFR1                                                                                                                                                          |
| PI3K events in ERBB4 signaling Homo sapiens R-HSA-1250342                       | 10/122  | 7.91E-15 | 0.000 | 70.90357143 | 2302.327214 | ERBB3;SRC;ERBB4;INSR;ERBB2;PIK3R1;FGFR3;EGFR;FGFR2;FGFR1                                                                                                                                                          |
| PIP3 activates AKT signaling Homo sapiens R-HSA-1257604                         | 10/122  | 7.91E-15 | 0.000 | 70.90357143 | 2302.327214 | ERBB3;SRC;ERBB4;INSR;ERBB2;PIK3R1;FGFR3;EGFR;FGFR2;FGFR1                                                                                                                                                          |
| PI-3K cascade:FGFR4 Homo sapiens R-HSA-5654720                                  | 10/122  | 7.91E-15 | 0.000 | 70.90357143 | 2302.327214 | ERBB3;SRC;ERBB4;INSR;ERBB2;PIK3R1;FGFR3;EGFR;FGFR2;FGFR1                                                                                                                                                          |
| PI-3K cascade:FGFR2 Homo sapiens R-HSA-5654695                                  | 10/122  | 7.91E-15 | 0.000 | 70.90357143 | 2302.327214 | ERBB3;SRC;ERBB4;INSR;ERBB2;PIK3R1;FGFR3;EGFR;FGFR2;FGFR1                                                                                                                                                          |
| Signalling to ERKs Homo sapiens R-HSA-187687                                    | 12/253  | 8.33E-15 | 0.000 | 42.70034277 | 1384.275438 | ERBB3;SRC;ERBB4;ERBB2;BRAF;JAK2;JAK3;FGFR3;EGFR;FGFR2;JAK1;FGFR1                                                                                                                                                  |
| GAB1 signalosome Homo sapiens R-HSA-180292                                      | 10/125  | 1.01E-14 | 0.000 | 69.04347826 | 2224.746748 | ERBB3;SRC;ERBB4;INSR;ERBB2;PIK3R1;FGFR3;EGFR;FGFR2;FGFR1                                                                                                                                                          |
| PI3K/AKT activation Homo sapiens R-HSA-198203                                   | 10/125  | 1.01E-14 | 0.000 | 69.04347826 | 2224.746748 | ERBB3;SRC;ERBB4;INSR;ERBB2;PIK3R1;FGFR3;EGFR;FGFR2;FGFR1                                                                                                                                                          |
| Signalling by NGF Homo sapiens R-HSA-166520                                     | 14/450  | 1.05E-14 | 0.000 | 29.86085627 | 961.1180073 | SRC;INSR;BRAF;PIK3R1;EGFR;ERBB3;ERBB4;ERBB2;JAK2;JAK3;FGFR3;FGFR2;JAK1;FGFR1<br>SYK;ROCK2;SRC;LRRK2;INSR;PLK1;BRAF;PTK6;PIK3R1;TYK2;EGFR;CDK8;FER;ERBB3;FNTA;ERBB4;FES;<br>ERBB2;JAK2;JAK3;FGFR3;FGFR2;JAK1;FGFR1 |
| Signal Transduction Homo sapiens R-HSA-162582                                   | 24/2465 | 1.45E-14 | 0.000 | 15.66332725 | 499.1302383 | ERBB2;JAK2;JAK3;FGFR3;FGFR2;JAK1;FGFR1                                                                                                                                                                            |
| NCAM signaling for neurite out-growth Homo sapiens R-HSA-375165                 | 12/266  | 1.52E-14 | 0.000 | 40.48818898 | 1288.248436 | ERBB3;SRC;ERBB4;ERBB2;BRAF;JAK2;JAK3;FGFR3;EGFR;FGFR2;JAK1;FGFR1                                                                                                                                                  |
| Developmental Biology Homo sapiens R-HSA-1266738                                | 16/786  | 5.62E-14 | 0.000 | 20.9924812  | 640.4693395 | CDK19;ROCK2;SRC;BRAF;EGFR;CDK8;ERBB3;ERBB4;FES;ERBB2;JAK2;JAK3;FGFR3;FGFR2;JAK1;FGFR1                                                                                                                             |
| Axon guidance Homo sapiens R-HSA-422475                                         | 14/515  | 6.68E-14 | 0.000 | 25.9001996  | 785.7260742 | ROCK2;SRC;BRAF;EGFR;ERBB3;ERBB4;FES;ERBB2;JAK2;JAK3;FGFR3;FGFR2;JAK1;FGFR1                                                                                                                                        |
| Constitutive Signaling by Aberrant PI3K in Cancer Homo sapiens R-HSA-2219530    | 8/61    | 1.03E-13 | 0.000 | 111.3179595 | 3329.374156 | ERBB3;ERBB4;ERBB2;PIK3R1;FGFR3;EGFR;FGFR2;FGFR1                                                                                                                                                                   |
| Signaling by the B Cell Receptor (BCR) Homo sapiens R-HSA-983705                | 11/233  | 1.38E-13 | 0.000 | 40.7606982  | 1206.951297 | ERBB3;SYK;SRC;ERBB4;INSR;ERBB2;PIK3R1;FGFR3;EGFR;FGFR2;FGFR1                                                                                                                                                      |
| Gastrin-CREB signalling pathway via PKC and MAPK Homo sapiens R-HSA-881907      | 13/432  | 1.79E-13 | 0.000 | 27.56541549 | 809.1560715 | SRC;BRAF;PIK3R1;EGFR;ERBB3;ERBB4;ERBB2;JAK2;JAK3;FGFR3;FGFR2;JAK1;FGFR1                                                                                                                                           |
| Downstream signaling events of B Cell Receptor (BCR) Homo sapiens R-HSA-1168372 | 10/192  | 7.83E-13 | 0.000 | 43.47912088 | 1212.021687 | ERBB3;SRC;ERBB4;INSR;ERBB2;PIK3R1;FGFR3;EGFR;FGFR2;FGFR1<br>SYK;SRC;TXK;INSR;BRAF;PIK3R1;TYK2;EGFR;HCK;ZAP70;ERBB3;ERBB4;ERBB2;JAK2;JAK3;FGFR3;FGFR2;JAK1;FGFR1                                                   |
| Immune System Homo sapiens R-HSA-168256                                         | 19/1547 | 8.34E-13 | 0.000 | 14.32849313 | 398.5120803 | 2;JAK1;FGFR1                                                                                                                                                                                                      |
| Signaling by ERBB2 Homo sapiens R-HSA-1227986                                   | 7/45    | 1.15E-12 | 0.000 | 131.0986842 | 3604.339983 | ERBB3;SRC;ERBB4;ERBB2;PTK6;PIK3R1;EGFR                                                                                                                                                                            |
| PI3K/AKT Signaling in Cancer Homo sapiens R-HSA-2219528                         | 8/86    | 1.79E-12 | 0.000 | 75.54415954 | 2043.267031 | ERBB3;ERBB4;ERBB2;PIK3R1;FGFR3;EGFR;FGFR2;FGFR1                                                                                                                                                                   |
| ERBB2 Activates PTK6 Signaling Homo sapiens R-HSA-8847993                       | 5/13    | 1.55E-11 | 0.000 | 415.7708333 | 10348.21758 | ERBB3;ERBB4;ERBB2;PTK6;EGFR                                                                                                                                                                                       |
| PI3K events in ERBB2 signaling Homo sapiens R-HSA-1963642                       | 5/16    | 5.25E-11 | 0.000 | 302.3333333 | 7156.522699 | ERBB3;ERBB4;ERBB2;PIK3R1;EGFR                                                                                                                                                                                     |
| Diseases of signal transduction Homo sapiens R-HSA-5663202                      | 9/288   | 1.20E-09 | 0.000 | 24.42431762 | 501.7986476 | CDK8;ERBB3;ERBB4;ERBB2;PIK3R1;FGFR3;EGFR;FGFR2;FGFR1                                                                                                                                                              |
| Signaling by PTK6 Homo sapiens R-HSA-8848021                                    | 6/67    | 1.69E-09 | 0.000 | 67.5093273  | 1363.588729 | ERBB3;ERBB4;LRRK2;ERBB2;PTK6;EGFR                                                                                                                                                                                 |
| Adaptive Immune System Homo sapiens R-HSA-1280218                               | 12/762  | 3.20E-09 | 0.000 | 13.36695652 | 261.4753039 | ZAP70;ERBB3;SYK;SRC;ERBB4;INSR;ERBB2;PIK3R1;FGFR3;EGFR;FGFR2;FGFR1                                                                                                                                                |
| ERBB2 Regulates Cell Motility Homo sapiens R-HSA-6785631                        | 4/15    | 1.06E-08 | 0.000 | 234.0645161 | 4298.501262 | ERBB3;ERBB4;ERBB2;EGFR                                                                                                                                                                                            |
| Signaling by GPCR Homo sapiens R-HSA-372790                                     | 14/1293 | 1.33E-08 | 0.000 | 9.739900964 | 176.6247481 | ROCK2;SRC;BRAF;PIK3R1;EGFR;ERBB3;ERBB4;ERBB2;JAK2;JAK3;FGFR3;FGFR2;JAK1;FGFR1                                                                                                                                     |
| SHC1 events in ERBB2 signaling Homo sapiens R-HSA-1250196                       | 4/18    | 2.36E-08 | 0.000 | 183.8801843 | 3229.128859 | ERBB3;ERBB4;ERBB2;EGFR                                                                                                                                                                                            |
| GPVI-mediated activation cascade Homo sapiens R-HSA-114604                      | 5/53    | 3.29E-08 | 0.000 | 69.15625    | 1191.526964 | SYK;PIK3R1;JAK2;JAK3;JAK1                                                                                                                                                                                         |
| PTK6 promotes HIF1A stabilization Homo sapiens R-HSA-8857538                    | 3/7     | 1.71E-07 | 0.000 | 467.8359375 | 7289.664133 | LRRK2;PTK6;EGFR                                                                                                                                                                                                   |
| Disease Homo sapiens R-HSA-1643685                                              | 10/725  | 2.97E-07 | 0.000 | 10.76923077 | 161.8523808 | CDK8;HCK;ERBB3;ERBB4;ERBB2;PIK3R1;FGFR3;EGFR;FGFR2;FGFR1                                                                                                                                                          |
| MAPK1 (ERK2) activation Homo sapiens R-HSA-112411                               | 3/9     | 4.09E-07 | 0.000 | 311.859375  | 4587.011006 | TYK2;JAK2;JAK1                                                                                                                                                                                                    |
| MAPK3 (ERK1) activation Homo sapiens R-HSA-110056                               | 3/10    | 5.84E-07 | 0.000 | 267.2946429 | 3836.509036 | TYK2;JAK2;JAK1                                                                                                                                                                                                    |
| Interleukin-6 signaling Homo sapiens R-HSA-1059683                              | 3/11    | 8.02E-07 | 0.000 | 233.8710938 | 3282.579863 | TYK2;JAK2;JAK1                                                                                                                                                                                                    |
| Interleukin-7 signaling Homo sapiens R-HSA-1266695                              | 3/11    | 8.02E-07 | 0.000 | 233.8710938 | 3282.579863 | PIK3R1;JAK3;JAK1                                                                                                                                                                                                  |
| G beta:gamma signalling through PI3Kgamma Homo sapiens R-HSA-                   | 4/48    | 1.45E-06 | 0.000 | 58.41935484 | 785.493754  | PIK3R1;JAK2;JAK3;JAK1                                                                                                                                                                                             |

|                                                                                             |       |             |       |             |             |                               |  |
|---------------------------------------------------------------------------------------------|-------|-------------|-------|-------------|-------------|-------------------------------|--|
| 392451                                                                                      |       |             |       |             |             |                               |  |
| G-protein beta:gamma signalling Homo sapiens R-HSA-397795                                   | 4/51  | 1.85E-06    | 0.000 | 54.68222375 | 721.7659866 | PIK3R1;JAK2;JAK3;JAK1         |  |
| GRB2 events in ERBB2 signaling Homo sapiens R-HSA-1963640                                   | 3/16  | 2.71E-06    | 0.000 | 143.8846154 | 1844.578682 | ERBB4;ERBB2;EGFR              |  |
| Regulation of signaling by CBL Homo sapiens R-HSA-912631                                    | 3/18  | 3.93E-06    | 0.000 | 124.6875    | 1551.831318 | HCK;SYK;PIK3R1                |  |
| Signaling by FGFR in disease Homo sapiens R-HSA-1226099                                     | 4/63  | 4.35E-06    | 0.000 | 43.53417168 | 537.4526891 | PIK3R1;FGFR3;FGFR2;FGFR1      |  |
| Platelet activation. signaling and aggregation Homo sapiens R-HSA-76002                     | 6/253 | 4.61E-06    | 0.000 | 16.51654335 | 202.9497903 | SYK;SRC;PIK3R1;JAK2;JAK3;JAK1 |  |
| IL-6-type cytokine receptor ligand interactions Homo sapiens R-HSA-6788467                  | 3/20  | 5.48E-06    | 0.000 | 110.0073529 | 1332.606216 | TYK2;JAK2;JAK1                |  |
| RAF-independent MAPK1/3 activation Homo sapiens R-HSA-112409                                | 3/23  | 8.49E-06    | 0.000 | 93.4921875  | 1091.696242 | TYK2;JAK2;JAK1                |  |
| PI3K Cascade Homo sapiens R-HSA-109704                                                      | 4/79  | 1.08E-05    | 0.000 | 34.21935484 | 391.4748995 | PIK3R1;FGFR3;FGFR2;FGFR1      |  |
| RAF activation Homo sapiens R-HSA-5673000                                                   | 3/25  | 1.10E-05    | 0.000 | 84.984375   | 970.3433957 | SRC;BRAF;JAK2                 |  |
| Interleukin-6 family signaling Homo sapiens R-HSA-6783589                                   | 3/27  | 1.40E-05    | 0.000 | 77.89453125 | 870.8542586 | TYK2;JAK2;JAK1                |  |
| Negative regulation of FGFR3 signaling Homo sapiens R-HSA-5654732                           | 3/29  | 1.74E-05    | 0.000 | 71.89543269 | 787.9584422 | SRC;BRAF;FGFR3                |  |
| Negative regulation of FGFR1 signaling Homo sapiens R-HSA-5654726                           | 3/32  | 2.35E-05    | 0.000 | 64.44827586 | 686.876629  | SRC;BRAF;FGFR1                |  |
| Negative regulation of FGFR2 signaling Homo sapiens R-HSA-5654727                           | 3/34  | 2.83E-05    | 0.000 | 60.28427419 | 631.3276883 | SRC;BRAF;FGFR2                |  |
| GRB7 events in ERBB2 signaling Homo sapiens R-HSA-1306955                                   | 2/5   | 2.97E-05    | 0.000 | 403.2727273 | 4204.515497 | ERBB3;ERBB2                   |  |
| Fcgamma receptor (FCGR) dependent phagocytosis Homo sapiens R-HSA-2029480                   | 4/120 | 5.59E-05    | 0.000 | 22.07897664 | 216.2016098 | HCK;SYK;SRC;PIK3R1            |  |
| FCGR activation Homo sapiens R-HSA-2029481                                                  | 3/49  | 8.56E-05    | 0.000 | 40.59578804 | 380.2169353 | HCK;SYK;SRC                   |  |
| GP1b-IX-V activation signalling Homo sapiens R-HSA-430116                                   | 2/10  | 1.33E-04    | 0.000 | 151.1893939 | 1349.727435 | SRC;PIK3R1                    |  |
| Signaling by FGFR3 fusions in cancer Homo sapiens R-HSA-8853334                             | 2/10  | 1.33E-04    | 0.000 | 151.1893939 | 1349.727435 | PIK3R1;FGFR3                  |  |
| Semaphorin interactions Homo sapiens R-HSA-373755                                           | 3/67  | 2.18E-04    | 0.001 | 29.15185547 | 245.8059719 | ROCK2;FES;ERBB2               |  |
| Downregulation of ERBB2:ERBB3 signaling Homo sapiens R-HSA-1358803                          | 2/13  | 2.29E-04    | 0.001 | 109.9393939 | 921.3628505 | ERBB3;ERBB2                   |  |
| Regulation of IFNG signaling Homo sapiens R-HSA-877312                                      | 2/14  | 2.67E-04    | 0.001 | 100.7727273 | 829.1167815 | JAK2;JAK1                     |  |
| Signaling by EGFRvIII in Cancer Homo sapiens R-HSA-5637812                                  | 2/15  | 3.08E-04    | 0.001 | 93.01631702 | 752.0916572 | PIK3R1;EGFR                   |  |
| Constitutive Signaling by EGFRvIII Homo sapiens R-HSA-5637810                               | 2/15  | 3.08E-04    | 0.001 | 93.01631702 | 752.0916572 | PIK3R1;EGFR                   |  |
| Spry regulation of FGF signaling Homo sapiens R-HSA-1295596                                 | 2/16  | 3.52E-04    | 0.001 | 86.36796537 | 686.8978438 | SRC;BRAF                      |  |
| Hemostasis Homo sapiens R-HSA-109582                                                        | 6/552 | 3.53E-04    | 0.001 | 7.358469117 | 58.48901632 | SYK;SRC;PIK3R1;JAK2;JAK3;JAK1 |  |
| Constitutive Signaling by Ligand-Responsive EGFR Cancer Variants Homo sapiens R-HSA-1236382 | 2/19  | 4.99E-04    | 0.001 | 71.11586453 | 540.6425814 | PIK3R1;EGFR                   |  |
| Signaling by Ligand-Responsive EGFR Variants in Cancer Homo sapiens R-HSA-5637815           | 2/19  | 4.99E-04    | 0.001 | 71.11586453 | 540.6425814 | PIK3R1;EGFR                   |  |
| Signaling by EGFR in Cancer Homo sapiens R-HSA-1643713                                      | 2/19  | 4.99E-04    | 0.001 | 71.11586453 | 540.6425814 | PIK3R1;EGFR                   |  |
| Signal transduction by L1 Homo sapiens R-HSA-445144                                         | 2/21  | 6.12E-04    | 0.002 | 63.62360447 | 470.7529763 | EGFR;FGFR1                    |  |
| L1CAM interactions Homo sapiens R-HSA-373760                                                | 3/96  | 6.27E-04    | 0.002 | 20.03225806 | 147.7145778 | SRC;EGFR;FGFR1                |  |
| Signaling by FGFR3 point mutants in cancer Homo sapiens R-HSA-8853338                       | 2/22  | 6.72E-04    | 0.002 | 60.43939394 | 441.498777  | PIK3R1;FGFR3                  |  |
| Signaling by FGFR3 in disease Homo sapiens R-HSA-5655332                                    | 2/22  | 6.72E-04    | 0.002 | 60.43939394 | 441.498777  | PIK3R1;FGFR3                  |  |
| Sema4D induced cell migration and growth-cone collapse Homo sapiens R-HSA-416572            | 2/24  | 8.01E-04    | 0.002 | 54.93939394 | 391.6646216 | ROCK2;ERBB2                   |  |
| Regulation of IFNA signaling Homo sapiens R-HSA-912694                                      | 2/25  | 8.70E-04    | 0.002 | 52.54808959 | 370.2930792 | TYK2;JAK1                     |  |
| Integrin alphaIIb beta3 signaling Homo sapiens R-HSA-354192                                 | 2/27  | 0.001015943 | 0.003 | 48.33939394 | 333.1521161 | SYK;SRC                       |  |
| Sema4D in semaphorin signaling Homo sapiens R-HSA-400685                                    | 2/27  | 0.001015943 | 0.003 | 48.33939394 | 333.1521161 | ROCK2;ERBB2                   |  |
| Negative regulation of FGFR4 signaling Homo sapiens R-HSA-                                  | 2/31  | 0.001340012 | 0.003 | 41.66353187 | 275.6074457 | SRC;BRAF                      |  |

|                                                                                                              |       |             |       |             |             |                |  |
|--------------------------------------------------------------------------------------------------------------|-------|-------------|-------|-------------|-------------|----------------|--|
| 5654733                                                                                                      |       |             |       |             |             |                |  |
| FGFR1 mutant receptor activation Homo sapiens R-HSA-1839124                                                  | 2/31  | 0.001340012 | 0.003 | 41.66353187 | 275.6074457 | PIK3R1;FGFR1   |  |
| CD28 co-stimulation Homo sapiens R-HSA-389356                                                                | 2/33  | 0.001518228 | 0.004 | 38.971652   | 252.9342688 | SRC;PIK3R1     |  |
| EPHA-mediated growth cone collapse Homo sapiens R-HSA-3928663                                                | 2/34  | 0.001611348 | 0.004 | 37.75189394 | 242.7704971 | SRC;ROCK2      |  |
| Platelet Aggregation (Plug Formation) Homo sapiens R-HSA-76009                                               | 2/37  | 0.001906654 | 0.005 | 34.51082251 | 216.1207577 | SYK;SRC        |  |
| MAP2K and MAPK activation Homo sapiens R-HSA-5674135                                                         | 2/38  | 0.002010374 | 0.005 | 33.55050505 | 208.3296666 | SRC;BRAF       |  |
| Signaling by FGFR1 in disease Homo sapiens R-HSA-5655302                                                     | 2/38  | 0.002010374 | 0.005 | 33.55050505 | 208.3296666 | PIK3R1;FGFR1   |  |
| Nuclear signaling by ERBB4 Homo sapiens R-HSA-1251985                                                        | 2/39  | 0.002116721 | 0.005 | 32.64209664 | 201.0063514 | ERBB4;JAK2     |  |
| EPHB-mediated forward signaling Homo sapiens R-HSA-3928662                                                   | 2/42  | 0.002451434 | 0.006 | 30.18939394 | 181.4709231 | ROCK2;SRC      |  |
| Signaling by FGFR2 in disease Homo sapiens R-HSA-5655253                                                     | 2/43  | 0.0025682   | 0.006 | 29.45158906 | 175.6654747 | PIK3R1;FGFR2   |  |
| Antigen activates B Cell Receptor (BCR) leading to generation of second messengers Homo sapiens R-HSA-983695 | 2/47  | 0.003061    | 0.007 | 26.82828283 | 155.3092959 | SYK;PIK3R1     |  |
| Interferon Signaling Homo sapiens R-HSA-913531                                                               | 3/196 | 0.00481639  | 0.011 | 9.604274611 | 51.24582285 | TYK2;JAK2;JAK1 |  |
| Role of phospholipids in phagocytosis Homo sapiens R-HSA-2029485                                             | 2/60  | 0.004941169 | 0.012 | 20.8014629  | 110.4589595 | SYK;PIK3R1     |  |
| FCERI mediated Ca+2 mobilization Homo sapiens R-HSA-2871809                                                  | 2/62  | 0.005267417 | 0.012 | 20.10606061 | 105.4807208 | SYK;TXK        |  |
| Interferon alpha/beta signaling Homo sapiens R-HSA-909733                                                    | 2/68  | 0.006303914 | 0.015 | 18.27272727 | 92.58031757 | TYK2;JAK1      |  |
| Costimulation by the CD28 family Homo sapiens R-HSA-388841                                                   | 2/72  | 0.007042367 | 0.016 | 17.22510823 | 85.36437955 | SRC;PIK3R1     |  |
| G alpha (12/13) signalling events Homo sapiens R-HSA-416482                                                  | 2/75  | 0.007620742 | 0.017 | 16.51473641 | 80.54041382 | ROCK2;PIK3R1   |  |
| Transcriptional regulation of white adipocyte differentiation Homo sapiens R-HSA-381340                      | 2/79  | 0.008424198 | 0.019 | 15.65367965 | 74.7721024  | CDK8;CDK19     |  |
| PTK6 Regulates Proteins Involved in RNA Processing Homo sapiens R-HSA-8849468                                | 1/5   | 0.008720203 | 0.019 | 146.7720588 | 696.0096582 | PTK6           |  |
| IRS activation Homo sapiens R-HSA-74713                                                                      | 1/5   | 0.008720203 | 0.019 | 146.7720588 | 696.0096582 | INSR           |  |
| PTK6 Expression Homo sapiens R-HSA-8849473                                                                   | 1/5   | 0.008720203 | 0.019 | 146.7720588 | 696.0096582 | PTK6           |  |
| RHO GTPase Effectors Homo sapiens R-HSA-195258                                                               | 3/255 | 0.009923264 | 0.022 | 7.333705357 | 33.82945386 | ROCK2;SRC;PLK1 |  |
